# Supplementary material for: Study protocol: NITric oxide during cardiopulmonary bypass to improve Recovery in Infants with Congenital heart defects (NITRIC trial): a randomised controlled trial
Source: PubMed Central journal article supplement — BMJ Open. 2019 Aug 15;9(8):e026664. doi: 10.1136/bmjopen-2018-026664 (PMC6701583; doi:10.1136/bmjopen-2018-026664), 2019-08-15
Supplement: bmjopen-2018-026664.draft_revisions.pdf [file bmjopen-2018-026664.draft_revisions.pdf]

# BMJ Open

BMJ Open is committed to open peer review. As part of this commitment we make the peer review history of every article we publish publicly available.

When an article is published we post the peer reviewers' comments and the authors' responses online. We also post the versions of the paper that were used during peer review. These are the versions that the peer review comments apply to.

The versions of the paper that follow are the versions that were submitted during the peer review process. They are not the versions of record or the final published versions. They should not be cited or distributed as the published version of this manuscript.

BMJ Open is an open access journal and the full, final, typeset and author-corrected version of record of the manuscript is available on our site with no access controls, subscription charges or pay-per-view fees (<http://bmjopen.bmj.com>).

If you have any questions on BMJ Open's open peer review process please email [info.bmjopen@bmj.com](mailto:info.bmjopen@bmj.com)

# BMJ Open

## Study Protocol: NITric oxide during cardiopulmonary bypass to improve Recovery in Infants with Congenital heart defects (NITRIC trial): A Randomised Controlled Trial.

|                               |                                                                                                                                                                                                                                                                                                                                                                                                                                                                                                                                                                                                                                                                                                                                                                                                                                                                                                                                                                                                                                                                                                                                                                                                                                                                                                                                                                                                                                                                                                                                                                                                                                                                           |
|-------------------------------|---------------------------------------------------------------------------------------------------------------------------------------------------------------------------------------------------------------------------------------------------------------------------------------------------------------------------------------------------------------------------------------------------------------------------------------------------------------------------------------------------------------------------------------------------------------------------------------------------------------------------------------------------------------------------------------------------------------------------------------------------------------------------------------------------------------------------------------------------------------------------------------------------------------------------------------------------------------------------------------------------------------------------------------------------------------------------------------------------------------------------------------------------------------------------------------------------------------------------------------------------------------------------------------------------------------------------------------------------------------------------------------------------------------------------------------------------------------------------------------------------------------------------------------------------------------------------------------------------------------------------------------------------------------------------|
| Journal:                      | <i>BMJ Open</i>                                                                                                                                                                                                                                                                                                                                                                                                                                                                                                                                                                                                                                                                                                                                                                                                                                                                                                                                                                                                                                                                                                                                                                                                                                                                                                                                                                                                                                                                                                                                                                                                                                                           |
| Manuscript ID                 | bmjopen-2018-026664                                                                                                                                                                                                                                                                                                                                                                                                                                                                                                                                                                                                                                                                                                                                                                                                                                                                                                                                                                                                                                                                                                                                                                                                                                                                                                                                                                                                                                                                                                                                                                                                                                                       |
| Article Type:                 | Protocol                                                                                                                                                                                                                                                                                                                                                                                                                                                                                                                                                                                                                                                                                                                                                                                                                                                                                                                                                                                                                                                                                                                                                                                                                                                                                                                                                                                                                                                                                                                                                                                                                                                                  |
| Date Submitted by the Author: | 19-Nov-2018                                                                                                                                                                                                                                                                                                                                                                                                                                                                                                                                                                                                                                                                                                                                                                                                                                                                                                                                                                                                                                                                                                                                                                                                                                                                                                                                                                                                                                                                                                                                                                                                                                                               |
| Complete List of Authors:     | Schlapbach, Luregn; The University of Queensland, Paediatric Critical Care Research Group<br>Horton, Steve; Royal Children's Hospital M, Cardiac Surgical Unit; University of Melbourne, Faculty of Medicine<br>Long, Debbie; Queensland Health, Lady Cilento Children's Hospital; Menzies Health Institute Queensland, Alliance for Vascular Access Teaching and Research Group<br>Beca, John; Starship Children's Hospital, Paediatric Intensive Care Unit<br>Erickson, Simon; Perth Children's Hospital, Paediatric Critical Care<br>Festa, Marino<br>d'Udekem, Yves; Royal Children's Hospital M, Cardiac Surgical Unit; University of Melbourne, Faculty of Medicine<br>Alphonso, Nelson; The University of Queensland, Paediatric Critical Care Research Group; Queensland Health, Lady Cilento Children's Hospital<br>Winlaw, David; The Children's Hospital at Westmead, Sydney Children's Hospital Network, Heart Centre for Children<br>Johnson, Kerry; Queensland Health, Lady Cilento Children's Hospital<br>Delzoppo, Carmel; Royal Children's Hospital M, Cardiac Surgical Unit<br>van Loon, Kim; University Medical Center Utrecht<br>Gannon, B; The University of Queensland, Centre for Business and Economics of Health<br>Fooker, Jonas; The University of Queensland, Centre for Business and Economics of Health<br>Blumenthal, Antje; The University of Queensland, Diamantina Institute<br>Young, Paul ; Wellington Hospital,<br>Jones, Mark; Bond University<br>Butt, Warwick; Royal Children's Hospital M, Cardiac Surgical Unit<br>Schibler , Andreas; Queensland University of Technology; Queensland Health, Lady Cilento Children's Hospital |
| Keywords:                     | infant, Cardiac surgery < SURGERY, mortality, nitric oxide, cardiopulmonary bypass, inflammation                                                                                                                                                                                                                                                                                                                                                                                                                                                                                                                                                                                                                                                                                                                                                                                                                                                                                                                                                                                                                                                                                                                                                                                                                                                                                                                                                                                                                                                                                                                                                                          |
|                               |                                                                                                                                                                                                                                                                                                                                                                                                                                                                                                                                                                                                                                                                                                                                                                                                                                                                                                                                                                                                                                                                                                                                                                                                                                                                                                                                                                                                                                                                                                                                                                                                                                                                           |

SCHOLARONE™  
Manuscripts

1  
2  
3  
4  
5  
6  
7  
8  
9  
10  
11  
12  
13  
14  
15  
16  
17  
18  
19  
20  
21  
22  
23  
24  
25  
26  
27  
28  
29  
30  
31  
32  
33  
34  
35  
36  
37  
38  
39  
40  
41  
42  
43  
44  
45  
46  
47  
48  
49  
50  
51  
52  
53  
54  
55  
56  
57  
58  
59  
60

1  
2  
3 **Title Page:**  
4

5 **Study Protocol: NITric oxide during cardiopulmonary bypass to improve Recovery in**  
6  
7 **Infants with Congenital heart defects (NITRIC trial): A Randomised Controlled Trial.**  
8  
9

10  
11  
12 Authors, highest degree and affiliations:  
13

- 14  
15 - Luregn J Schlapbach, MD, FCICM, Paediatric Critical Care Research Group, Child  
16 Health Research Institute, The University of Queensland; Paediatric Intensive Care  
17 Unit, Queensland Children's Hospital, Children's Health Queensland, Brisbane,  
18 Australia. Email: l.schlapbach@uq.edu.au  
19  
20  
21  
22  
23 - Steve B Horton PhD, Cardiac Surgical Unit, Royal Children's Hospital, Melbourne.  
24 Faculty of Medicine, Department of Paediatrics, University of Melbourne. Honorary  
25 Research Fellow, Murdoch Children's Research Institute, Melbourne, Australia. Email:  
26 Steve.Horton@rch.org.au  
27  
28  
29  
30  
31  
32 - Debbie Long, PhD, Paediatric Critical Care Research Group, Child Health Research  
33 Institute, The University of Queensland; Paediatric Intensive Care Unit, Queensland  
34 Children's Hospital, Children's Health Queensland, Brisbane, Australia. Email:  
35 Debbie.Long2@health.qld.gov.au  
36  
37  
38  
39  
40  
41  
42 - John Beca, MBChB, FCICM. FRACP, Paediatric Intensive Care Unit, Starship  
43 Children's Hospital, Auckland, New Zealand. Email: JohnBeca@adhb.govt.nz  
44  
45  
46  
47 - Simon Erickson, MBBS FCICM, Paediatric Critical Care, Perth Children's Hospital,  
48 Western Australia and The University of Western Australia. Email:  
49 Simon.Erickson@health.wa.gov.au  
50  
51  
52  
53 - Marino Festa, MD, FCICM, Kids Critical Care Research, Paediatric Intensive Care  
54 Unit, Children's Hospital at Westmead, Sydney Children's Hospital Network, Sydney,  
55 New South Wales, Australia. Email: marino.festa@health.nsw.gov.au  
56  
57  
58  
59  
60

- 1  
2  
3  
4  
5  
6  
7  
8  
9  
10  
11  
12  
13  
14  
15  
16  
17  
18  
19  
20  
21  
22  
23  
24  
25  
26  
27  
28  
29  
30  
31  
32  
33  
34  
35  
36  
37  
38  
39  
40  
41  
42  
43  
44  
45  
46  
47  
48  
49  
50  
51  
52  
53  
54  
55  
56  
57  
58  
59  
60
- Yves d'Udekem, MD, PhD, Department of Cardiac Surgery, Royal Children's Hospital, Melbourne, Australia; Heart Research, Murdoch Childrens Research Institute, Melbourne, Australia; Department of Paediatrics, The University of Melbourne, Melbourne, Australia. Email: Yves.Dudekem@rch.org.au
  - Nelson Alphonso, FRCS (C.Th), FRACS, Cardiac Surgery, Queensland Children's Hospital, and Associate Professor, School of Medicine, Children's Health Clinical Unit, University of Queensland, Brisbane, Queensland, Australia. Email: nelson.alphonso@health.qld.gov.au
  - David Winlaw MBBS, MD, FRACS, Heart Centre for Children, The Children's Hospital at Westmead, Sydney Children's Hospital Network, and Faculty of Medicine and Health, University of Sydney, Sydney, Australia. Email: david.winlaw@health.nsw.gov.au
  - Kerry Johnson, Paediatric Critical Care Research Group, Child Health Research Institute, The University of Queensland; Paediatric Intensive Care Unit, Queensland Children's Hospital, Children's Health Queensland, Brisbane, Australia. Email: Kerry.Johnson3@health.qld.gov.au
  - Carmel Delzoppo, BHS, Paediatric Intensive Care Unit Royal Children's Hospital Melbourne, Murdoch Children's Research Institute. Email: Carmel.Delzoppo@rch.org.au
  - Kim van Loon, MD, PhD, Division of Anaesthetics, University Medical Center Utrecht Utrecht, the Netherlands. Email: k.vanloon1@gmail.com
  - Brenda Gannon, PhD, Professor of Health Economics, Centre for the Business and Economics of Health, The University of Queensland, Brisbane, Australia. Email: brenda.gannon@uq.edu.au

- 1  
2  
3 - Jonas Fooker, PhD, Centre for the Business and Economics of Health, The University  
4 of Queensland, Brisbane, Australia. Email: [j.fooker@uq.edu.au](mailto:j.fooker@uq.edu.au)  
5  
6  
7  
8 - Antje Blumenthal, Dr rer. nat., Associate Professor and Head of the Infection and  
9 Inflammation Group at The University of Queensland Diamantina Institute, The  
10 University of Queensland, Translational Research Institute, Brisbane, Australia. Email:  
11  
12  
13  
14  
15  
16  
17 - Paul Young, MBChB, FCICM, PhD, Director of the Intensive Care Research  
18 Programme, Medical Research Institute of New Zealand, Wellington, New Zealand  
19  
20  
21  
22  
23  
24  
25  
26  
27  
28  
29  
30  
31  
32  
33  
34  
35  
36  
37  
38  
39  
40  
41  
42  
43  
44  
45  
46  
47  
48  
49  
50  
51  
52  
53  
54  
55  
56  
57  
58  
59  
60
- Mark Jones, PhD, School of Public Health, Bond University, South Port, Australia.  
Email: [majones@bond.edu.au](mailto:majones@bond.edu.au)
  - Warwick Butt, Associate Professor, MB B.S, FRACP, FJFICM, FCICM. Paediatric  
Intensive Care Unit Royal Children's Hospital Melbourne, Murdoch Children's  
Research Institute, Melbourne University. Email: [Warwick.Butt@rch.org.au](mailto:Warwick.Butt@rch.org.au)
  - Andreas Schibler, MD, FCICM, Paediatric Critical Care Research Group, Child Health  
Research Institute, The University of Queensland; Paediatric Intensive Care Unit,  
Queensland Children's Hospital, Children's Health Queensland, Brisbane, Australia.  
Email: [a.schibler@uq.edu.au](mailto:a.schibler@uq.edu.au)

**On behalf of the NITRIC Study Group, the Australian and New Zealand Intensive Care  
Society Clinical Trials Group (ANZICS CTG), the Paediatric Critical Care Research  
group (PCCRG) and the ANZICS Paediatric Study Group (PSG)**

## **Correspondence**

1  
2  
3 A/Prof Andreas Schibler, MD, FCICM  
4

5 Paediatric Critical Care Research Group (PCCRG), Child Health Research Centre, Queensland  
6  
7 Children's Hospital Precinct and Mater Research Institute, The University of Queensland Level  
8  
9  
10 7, 62 Graham St, South Brisbane, Queensland, 4101, Australia  
11

12  
13 Email: [a.schibler@uq.edu.au](mailto:a.schibler@uq.edu.au)  
14

15 Phone: ++61 (0) 7 3068 11 11  
16  
17

18  
19  
20 *Alternative correspondence:*  
21

22 A/Prof Luregn J. Schlapbach, MD, FCICM  
23

24 Paediatric Critical Care Research Group, Child Health Research Institute, The University of  
25  
26 Queensland; and Queensland Children's Hospital, Children's Health Queensland, The  
27  
28 University of Queensland Level 7, 62 Graham St, South Brisbane, Queensland, 4101, Australia  
29

30  
31 Email: [l.schlapbach@uq.edu.au](mailto:l.schlapbach@uq.edu.au)  
32

33 Phone: ++61 (0) 7 3068 11 11  
34  
35  
36  
37  
38  
39

40 **Conflict of Interest Statement:**  
41

42 Yves d'Udekem is a consultant for MSD and Actelion.  
43

44 LJS, SH, DL, KJ, NA, DW, MF, SE, JB, CD, KL, MJ, AF, BG, AB, PY, WB, AS have no  
45  
46 conflicts of interest to declare.  
47  
48  
49

50  
51 **Word count:** 3441  
52  
53  
54  
55

56 **Key words:** cardiopulmonary bypass; child; congenital heart disease; infant; inflammation;  
57  
58 ventilation; nitric oxide; mortality  
59  
60

**Abbreviations:**

|                   |                                  |
|-------------------|----------------------------------|
| CPB               | Cardio Pulmonary Bypass          |
| CHD               | Congenital Heart Disease         |
| ECLS              | Extracorporeal Life Support      |
| FiO <sub>2</sub>  | Fraction of inspired oxygen      |
| CO <sub>2</sub>   | Carbon dioxide                   |
| NO                | Nitric oxide                     |
| SaO <sub>2</sub>  | Arterial oxygen saturation       |
| ScvO <sub>2</sub> | Central venous oxygen saturation |
| PICU              | Paediatric Intensive Care Unit   |

**Study Protocol: NITric oxide during cardiopulmonary bypass to improve Recovery in Infants with Congenital heart defects (NITRIC trial): A Randomised Controlled Trial.**

Trial registration: ACTRN12617000821392

Protocol Version 1.3, dated 17<sup>th</sup> July 2018

**Funding sources:** This work was supported by grants from the Heart Kids Foundation, Australia; the Children's Health Foundation, Brisbane, Australia; and by a grant from the Australian National Health and Medical Research Council (1140322).

Luregn Schlapbach, Yves d'Udekem, Andreas Schibler hold a NHMRC Clinical Practitioner Fellowship. The Victorian Government's Operational Infrastructure Support Program



1  
2  
3 supported this research project. Paul Young holds a Clinical Practitioner Fellowship from the  
4  
5 Health Research Council of New Zealand  
6  
7  
8  
9

10 The funding sources had no involvement in study design, analyses, nor interpretation of the  
11  
12 results.  
13

14 Mallinckrodt Pharmaceuticals will provide nitric oxide delivery devices to study centres but  
15  
16 has no involvement in study design, conduct, nor analyses.  
17  
18  
19  
20  
21  
22  
23  
24  
25  
26  
27

### 28 **Author contributorship statement:**

29  
30  
31 The study protocol first draft was designed by LJS and AS based on the previous pilot study  
32  
33 design established by SH, and WB. MJ wrote the section on statistical analyses. JF and BG  
34  
35 wrote the section on health economic analyses The present study protocol has been revised  
36  
37 with input from SH, DL, JB, SE, MF, YdU, NA, DW, KJ, CD, KvL, BG, JF, PY, AB, MJ and  
38  
39 WB. LJS prepared the final protocol manuscript which was reviewed and approved by all  
40  
41 authors.  
42  
43  
44  
45  
46

### 47 **Roles and Responsibilities:**

48  
49 The study protocol first draft was designed by LJS and AS based on the previous pilot study  
50  
51 design established by SH, and WB. The present study protocol has been revised with input  
52  
53 from SH, DL, KJ, CJ, CD, WB, SE, MF, BG, JF, PY, AB, MJ and JB.  
54  
55

56 The study steering group consists of LJS, SH, DL, WB and AS.  
57  
58  
59  
60

1  
2  
3 LJS, AS, DL, KJ, NA, SE, WB, SH, CdZ, KL, YdU, MF, JB are responsible for local study  
4  
5 setup conduct, and recruitment.  
6

7  
8 AB and LJS are responsible for host inflammation analyses.  
9

10  
11 MJ is responsible for statistical analyses.  
12

13  
14 JF and BG are responsible for health economic analyses.  
15  
16  
17  
18  
19  
20  
21  
22  
23  
24  
25  
26  
27  
28  
29  
30  
31  
32  
33  
34  
35  
36  
37  
38  
39  
40  
41  
42  
43  
44  
45  
46  
47  
48  
49  
50  
51  
52  
53  
54  
55  
56  
57  
58  
59  
60

For peer review only

## Abstract

**Introduction:** Congenital heart disease (CHD) is a major cause of infant mortality in industrialised countries. Many infants with CHD require corrective surgery with most operations requiring cardiopulmonary bypass (CPB). CPB triggers a systemic inflammatory response which is associated with low cardiac output syndrome (LCOS), post-operative morbidity and mortality. Delivery of nitric oxide (NO) into CPB circuits can provide myocardial protection and reduce bypass-induced inflammation, leading to less LCOS and improved recovery. We hypothesized that using NO during CPB increases ventilator-free days (the number of days patients spend alive and free from invasive mechanical ventilation up until day 28) compared with standard care. Here we describe the NITRIC trial protocol.

**Methods and Analysis:** The NITRIC trial is a randomised, double blind, controlled, parallel-group, two-sided superiority trial to be conducted in at least five paediatric cardiac surgical centres. 1320 infants below two years of age undergoing cardiac surgery with CPB will be randomly assigned to NO at 20ppm administered into the CPB oxygenator for the duration of CPB or standard care (no NO) in a 1:1 ratio with stratification by age (<six weeks  $\geq$ six weeks), single ventricle physiology (Y/N), and study centre. The primary outcome will be ventilator-free days to day 28. Secondary outcomes include a composite of LCOS, need for extracorporeal membrane oxygenation, or death within 28 days of surgery; length of stay in intensive care and in hospital; and, health care costs. Analyses will be conducted on an intention to treat basis. Pre-planned secondary analyses will investigate the impact of NO on host inflammatory profiles post surgery.

**Ethics and dissemination:** The study has ethical approval (HREC/17/QRCH/43) and is registered in the Australian New Zealand Clinical Trials Registry (ACTRN12617000821392). The NITRIC trial commenced recruitment in 2017. The primary manuscript will be submitted for publication in a peer reviewed journal.

**Strengths and limitations of this study:**

- This study tests the efficacy and safety of a simple intervention during cardiopulmonary bypass to improve early postoperative morbidity.
- The intervention aims to reduce patient-centred adverse outcomes after a common high-risk procedure for the most common congenital condition.
- The study includes follow-up of neurodevelopmental outcome and quality of life which will allow assessment of the long-term impact of the intervention.
- The study includes biobanking to investigate the biological mechanisms underlying the clinical findings in nested studies.
- The study will be the largest randomised controlled trial performed in paediatric cardiac surgery to date.

## Introduction

Congenital heart disease (CHD) is the most common congenital condition, affecting around one in a hundred live born children[1]. Up to 50% need cardiac surgery to correct the underlying abnormality at some stage during their life, with the majority of procedures requiring cardiopulmonary bypass (CPB). Substantial reductions in perioperative mortality in children following cardiac surgery have been achieved[2], and adult survivors of CHD now outnumber paediatric patients with CHD in most high income countries[3, 4]. Despite these advances, major postoperative morbidity remains common and is associated with increased rate of long term mortality, morbidity, and disability[5]. The exposure of host blood to large artificial organ surfaces combined with myocardial injury during surgery, results in a strong systemic inflammatory response of the host, which is further aggravated by reperfusion injury and the release of damage-associated molecular patterns during surgery[6]. Endotoxin release, leukocyte and complement activation, widespread activation of inflammatory mediators, and endothelial leak[7] postoperatively contribute to low cardiac output syndrome (LCOS) [8, 9]. Postoperative LCOS is clinically defined by a need for inotropes to maintain end organ perfusion, an increased arterial-venous oxygen extraction, lactataemia, and oliguria. LCOS may lead to multi-organ failure and a need for extracorporeal life support (ECLS)[10]. Several studies have shown that the presence and severity of LCOS, which affects 25-40% of children post CPB in the first hours following heart surgery[11], is strongly associated with postoperative morbidity and mortality. CPB-related side effects are most pronounced in infants and young children[12] due to their higher metabolic requirement, altered inflammatory response, and higher CPB circuit to patient blood volume. At the same time, this age group is exposed to CPB during a vulnerable phase of brain development [13-15] and remains at highest risk of suffering neurological impairments[16] due to acute brain injury occurring within the context of LCOS. Recent trials to reduce LCOS during cardiac surgery for CHD testing

1  
2  
3 interventions such as steroids[17] have not demonstrated consistent benefit[18]. Given the  
4  
5 adverse effects of cardiopulmonary bypass on early recovery and long-term neurodevelopment  
6  
7 there remains an urgent need for clinical trials evaluating novel therapies to address these  
8  
9 problems[5].  
10

11  
12 Nitric oxide (NO) is an endogenous anti-inflammatory mediator[19] and is essential to regulate  
13  
14 endothelial function and microvascular inflammation[20]. Several studies have demonstrated  
15  
16 that exogenous NO can reduce myocardial damage in clinical and experimental settings of  
17  
18 ischaemia and reperfusion[21-24]. A previous small single centre study in 16 children reported  
19  
20 a reduction in bypass-induced inflammation using gaseous NO delivered at 20ppm to CPB  
21  
22 circuits[25]. The duration of mechanical ventilation was significantly shorter (8.4 versus 16.3  
23  
24 hours;  $P < .05$ ) and so was ICU length of stay (53.8 versus 79.4 hours;  $P < .05$ ) in children  
25  
26 receiving NO compared to the placebo group. We have previously reported the feasibility and  
27  
28 safety of NO delivery to CPB in a single centre randomized controlled pilot study in 198 infants  
29  
30 and children (0-16 years) undergoing cardiac surgery[26]. This pilot study demonstrated a  
31  
32 statistically significantly lower proportion of children with a LCOS in the intervention arm, a  
33  
34 reduced requirement for ECLS, and a trend to reduced length of stay, and shorter duration of  
35  
36 mechanical ventilation. The effect was greatest in children under two years of age, with the  
37  
38 greatest treatment benefit observed in children under six weeks.  
39  
40  
41  
42  
43

44 Accordingly, we designed the NITRIC trial to test the primary hypothesis that, in infants under  
45  
46 two years having cardiac surgery, using NO during CPB increases ventilator-free days (the  
47  
48 number of days patients spend alive and free from invasive mechanical ventilation up until  
49  
50 post-operative day 28) compared with standard care. Here we describe the NITRIC trial  
51  
52 protocol.  
53  
54  
55  
56  
57  
58  
59  
60

## METHODS

The NITRIC trial is a 1320-patient multicentre, randomised, double-blind, standard care-controlled, parallel-group, trial in infants and children < 2 years of age undergoing open heart surgery on CPB (**Figure 1**).

**Study setting.** Tertiary/quaternary paediatric cardiac surgical services in Australia and New Zealand, including Cardiac and Paediatric Intensive Care Services of Royal Children's Hospital, Melbourne; Starship Children's Hospital Auckland NZ; The Children's Hospital at Westmead, Sydney; Princess Margaret Hospital for Children, Perth; and Queensland Children's Hospital, Brisbane. Addition of a further international study site is in progress.

**Participants.** Eligible children will be identified in the pre-operative clinics, in the general cardiac wards or in the neonatal or paediatric intensive care unit. **Included** will be infants and children < 2 years of age undergoing elective open heart surgery on CPB where consent of parents/guardian is obtained prior to surgery. The **exclusion criteria** relate to patient characteristics that will interfere with consent, with the intervention, or with measurement of the primary and secondary outcomes. Inclusion and exclusion criteria are shown in **Table 1**.

*Enrolment of patients undergoing repeated surgery during the first two years of life:* In order to assess the impact of the intervention on long-term outcomes, patients who were previously enrolled and randomised into the study who require a second or subsequent surgical procedure (such as a patient with single ventricle physiology requiring a staged palliation) will undergo the same treatment allocation for subsequent surgeries requiring CPB, unless parents opt out. Patients who were not recruited into the study during their first procedure, but are scheduled for a subsequent procedure requiring CPB prior to their second birthday, will be eligible for recruitment.

1  
2  
3 **Randomisation and Blinding.** Treatment assignment will be performed using a secure,  
4 centralised, web-based randomisation interface (REDCap [27], The University of Queensland).  
5  
6 The allocation sequence will be generated by the study statistician using computer-generated  
7 random numbers using a variable block size stratified by age (< six weeks, six weeks to 24  
8 months), univentricular versus biventricular lesions, and by site. Of the investigating team,  
9 only the study perfusionist will be aware of the randomisation and NO delivery. Parents and  
10 caregivers will be blinded for the intervention. *Rationale for stratification:* The age group  
11 under six weeks represents the cohort at highest surgical risk. In the pilot study the effect size  
12 of the NO delivery was greatest in these infants. Cardiac physiology (univentricular versus  
13 biventricular) is a major determinant of surgical complexity, risk, and outcome.

14  
15 **Blinding of the Intervention.** Blinding arrangements in the operating theatre will be achieved  
16 by covering the NO delivery system with drapes. The dedicated study NO delivery system will  
17 be connected to the CPB oxygenator at all times, independent of randomisation. The family,  
18 surgeons, anaesthetists and PICU staff will be not aware of the treatment arm a patient is  
19 allocated to. The perfusionists will be advised that all aspects of CPB except for provision of  
20 NO (or not) should be performed according to standard institutional practice for study  
21 participants.

22  
23 **Interventions.** Infants will be randomly assigned to NO or standard care. Those allocated to  
24 the *NO arm* will receive NO during CPB blended into the fresh gas flow of the CPB  
25 oxygenator, which is kept at 3L/min. NO levels are maintained at 20 ppm using a NO delivery  
26 system (Ikaria INOmax DSIR, Ikaria, NJ, USA) or similar device. Continuous sampling of NO  
27 and NO<sub>2</sub> concentration will be undertaken from an access port before the oxygenator. NO will  
28 be started immediately when the patient is placed on CPB and ceased once weaned off CPB.  
29 Patients allocated to the *standard study arm* will receive the standard gase oxygen-air mix into  
30 the CPB oxygenator at a flow rate of 3L/min. If patients require several CPB runs during the  
31  
32  
33  
34  
35  
36  
37  
38  
39  
40  
41  
42  
43  
44  
45  
46  
47  
48  
49  
50  
51  
52  
53  
54  
55  
56  
57  
58  
59  
60



1  
2  
3 same procedure, the study treatment will be provided for each CPB run using the same  
4  
5 treatment allocation for every CPB run.  
6  
7

8  
9 **Relevant concomitant perioperative care.** Arterial partial pressures of CO<sub>2</sub> will be  
10  
11 maintained constantly in both study arms as per institutional practice (following each centre's  
12  
13 protocols on alpha/pH stat and temperatures). The FiO<sub>2</sub> of the fresh gas flow will be set  
14  
15 between 21% and 100%, according to centre specific CPB protocols. Techniques of anaesthesia  
16  
17 and surgery will not be specified to allow site specific individual practice. The decision whether  
18  
19 a patient requires treatment with inhaled NO (iNO) into the ventilator circuit prior to, during,  
20  
21 or after CPB remains at the discretion of the treating physicians (anaesthetists, cardiac  
22  
23 surgeons, or intensivists) independent of treatment allocation. The postoperative care and  
24  
25 decisions on inotropes and other vasoactive drug delivery, fluid management, renal  
26  
27 replacement therapy, iNO therapy or indication for ECLS will be performed as per site specific  
28  
29 standard protocols of care.  
30  
31  
32  
33  
34  
35

36  
37 **Study outcomes (Table 2).** The **Primary outcome** is ventilator free days (VFD) for the first  
38  
39 28 days post randomisation. The primary outcome will be measured using duration of invasive  
40  
41 respiratory support for all episodes with an endotracheal tube in situ for the first 28 days post  
42  
43 randomisation. A systematic zero value will be assigned for patients who die to weigh death as  
44  
45 the most pejorative outcome. **Secondary outcomes** are defined as the composite outcome  
46  
47 compromising LCOS, need for postoperative ECLS, or 28-day mortality; ICU and hospital  
48  
49 length of stay; and health care costs. In addition, the long-term outcome of patients will be  
50  
51 followed up at twelve months post procedure.  
52  
53

54  
55 **LCOS**[10] is defined as a blood lactate level greater than 4 mmol/l with an oxygen extraction  
56  
57 of greater than 35% (SaO<sub>2</sub>-ScvO<sub>2</sub> gradient >35%) within the first 48 hours postoperatively, or  
58  
59 a high inotrope requirement defined as Vasoactive-Inotrope Score  $\geq 15$  (VIS)[28, 29].  
60

1  
2  
3 **Rationale for primary and secondary outcomes:** Ventilator free days represents one of the  
4 strongest predictors of short- and long-term outcomes[10], including length of intensive care  
5 unit (ICU) stay, morbidity (impaired neurodevelopment, hospital-acquired infections) and  
6 mortality. VFD directly reflect intensive care resource use and health care costs[30]. The  
7 composite of LCOS, ECLS use, and mortality as a secondary end point, is a strong patient-  
8 centred outcome and directly relates to the intervention in terms of biological plausibility.  
9  
10  
11  
12  
13  
14  
15  
16  
17  
18

19 **Adverse Events:** It is recognised that the postoperative paediatric cardiac surgical patient  
20 population will experience a number of common aberrations in laboratory values, signs and  
21 symptoms due to the severity of the underlying disease and the impact of standard therapies.  
22 Intensive care patients will frequently develop life-threatening organ failure(s) unrelated to  
23 study interventions and despite optimal management. Therefore, consistent with established  
24 practice in academic ICU trials[31], events that are part of the natural history of the primary  
25 disease process or expected complications of critical illness will not be reported as serious  
26 adverse events in this study. All adverse events which are considered to be potentially causally  
27 related to the study intervention or are otherwise of concern in the investigator's judgement  
28 will be reported unless they are pre-specified study outcomes. Specific adverse events related  
29 to NO delivery during CBP include air embolism, severe hypotension during bypass and  
30 increased MetHb (MetHb >3%). Of note, in previous studies, methaemoglobin values using  
31 NO at 20 ppm were similar in both the control and intervention groups (1.4%)[25, 26]. Events  
32 that are collected as study outcomes will not be reported as adverse events.  
33  
34  
35  
36  
37  
38  
39  
40  
41  
42  
43  
44  
45  
46  
47  
48  
49  
50

51 **Safety Data Monitoring.** The Data Safety Monitoring Board (DSMB) consists of a general  
52 and a cardiac paediatric intensivist, a cardiac surgeon, and a statistician. None of the DSMB  
53 members will be involved in recruitment of study patients at their site. DSMB members will  
54 not be supervised by any study investigator or participate as investigators in any study currently  
55  
56  
57  
58  
59  
60

1  
2  
3 under review by this DSMB. The primary objective of the DSMB is to monitor the safety of  
4 the intervention and the validity and integrity of the data from the NITRIC study. Additionally,  
5 the DSMB will evaluate the pace of recruitment and will make recommendations to the  
6 NITRIC Chief investigator(s) and Steering Board regarding the continuation, modification, or  
7 termination of the study. The DSMB will evaluate on an ongoing basis, the accumulating safety  
8 assessments to ensure the ongoing safety of study subjects. The DSMB will meet via  
9 teleconference call after recruitment of 660, and of 1000 children, respectively, and upon trial  
10 completion.

11  
12 The DSMB can request unblinding in the event of a serious adverse event defined as a cardiac  
13 arrest, need for ECLS, or other incident leading to permanent harm considered to be likely  
14 related to the study intervention.

15  
16  
17  
18  
19  
20  
21  
22  
23  
24  
25  
26  
27  
28  
29  
30  
31  
32 **Sample size.** A pilot study showed an approximate 66 hours (0.33 SD) increase in ventilator-  
33 free days (VFD) associated with the study intervention [26]. Based on the primary outcome  
34 measure VFD, 1,320 patients (660 per group) would be required to demonstrate a significant  
35 increase in VFD assuming a minimally clinically significant small effect size (0.2 SD), 90%  
36 power, two-sided alpha level of significance of 5%, 10% withdrawals, and 15% increase in  
37 sample size to account for a non-normal distribution of VFD. In Australia and New Zealand  
38 approximately 800 of children < 2 years of age undergo surgery for a congenital heart defect  
39 requiring CPB each year, including patients with multiple procedures. The consent rate of  
40 eligible patients was 78% in the pilot trial[26]. With an expected conservative estimate 60%  
41 enrolment rate of eligible patients, we expect a three year recruitment period for the study.

#### 42 43 44 45 46 47 48 49 50 51 52 53 54 55 56 57 **Data collection, management, and analysis** 58 59 60

1  
2  
3 **Data collection:** Baseline variables (demographics, primary cardiac diagnosis, comorbidities  
4 including syndromes), pre-operative disease severity, surgical data (length of CPB and cross-  
5 clamp, type of surgery and complexity score, other CPB characteristics, blood product usage),  
6 primary end points, secondary end points, pre-determined physiological variables of interest,  
7 and process of care measures will be prospectively recorded into a study REDCap online  
8 database. Plausibility and range checks are implemented. Paired arterial and venous gases will  
9 be collected postoperatively at 0, 6, 12, 24, and 48 hrs (in PICU until discharge to the ward or  
10 removal of arterial and central venous lines, whichever occurs first) to assess for lactate and  
11 SaO<sub>2</sub>-ScvO<sub>2</sub> gradient. Key physiological and blood parameters and Paediatric Logistic Organ  
12 Dysfunction-2 (PELOD-2) scores[32] will be measured at 0, 6, 12, 24, and 48 hours post  
13 admission or until PICU discharge whichever occurs earlier. Delayed chest closure, use of  
14 inhaled NO, and duration of circulatory, renal, and ventilatory support postoperatively will be  
15 recorded. Gross functional performance assessment will be recorded on admission to PICU  
16 and upon discharge from hospital[33]. Neurological and functional outcome (including phone  
17 interviews with parents/caregivers) will be assessed at 12 months postoperatively using Ages  
18 and Stages questionnaires (ASQ)[34, 35] and assessment of quality of life using paediatric  
19 quality of life inventory (PedsQL)[36]. Details on the long-term follow-up will be published  
20 separately.

21  
22  
23  
24  
25  
26  
27  
28  
29  
30  
31  
32  
33  
34  
35  
36  
37  
38  
39  
40  
41  
42  
43  
44  
45  
46  
47 **Biobanking:** Blood markers for myocardial injury and inflammatory response will be collected  
48 on induction of anaesthesia (baseline – pre-bypass), at admission to PICU (0 hours – post  
49 bypass) and at 12, and 24 hours. Blood will be collected pre-surgery as preoperative baseline  
50 (before onset of cardiac surgery, done by anaesthetist during the induction of the patient once  
51 the arterial line has been inserted): 1-2ml of EDTA blood (for DNA), 2.5ml of PAXgene blood  
52 (for gene expression markers), 1-2ml of serum; and postoperatively at 0,12,24 hours (in PICU  
53  
54  
55  
56  
57  
58  
59  
60

1  
2  
3 until discharge to the ward): 2.5ml of PAXgene blood (time point 0), and 1-2ml of serum. The  
4  
5 samples will be processed, stored and shipped according to accepted international standards  
6  
7 and batch analysed.  
8  
9

10  
11 The investigators are responsible for ensuring the accuracy, completeness, legibility, and  
12  
13 timeliness of the data reported. The investigators will maintain adequate case histories of study  
14  
15 participants, including accurate case report forms (CRFs), and source documentation. Data will  
16  
17 be prospectively entered into a secure web-based database (REDCap  
18  
19 <https://redcap.health.uq.edu.au/>), hosted by the University of Queensland. Printed paper CRFs  
20  
21 will be available if required. All study information and documentation will be securely stored  
22  
23 for a period of 15 years after the date of the child's eighteenth birthday.  
24  
25  
26  
27  
28  
29

### 30 **Statistical Analysis Plan**

31  
32 **Analysis plan.** Analyses will apply the intention to treat principle. Descriptive statistics will  
33  
34 be used to describe baseline characteristics of the study cohort and each subgroup by treatment  
35  
36 group. The primary outcome measure will be analysed using a Mann-Whitney test as  
37  
38 ventilator-free days is non-normally distributed variable. Analysis of secondary outcomes  
39  
40 includes both comparisons of measurements and proportions, using confidence intervals of  
41  
42 differences as the major method of presentation where possible, otherwise standard techniques  
43  
44 such as Mann-Whitney U tests, t-tests and chi-squared tests will be utilised. Survival outcomes  
45  
46 will be compared between treatment groups using Kaplan-Meier product limit method and log-  
47  
48 rank test. Statistical significance will be set at the 0.05 level for the primary outcome.  
49  
50  
51  
52  
53

54  
55 A safety and efficacy interim analysis after 660 (the half-way point), and after 1000 enrolled  
56  
57 patients will be performed by an independent statistician to evaluate for safety endpoints, to  
58  
59 assess the predictive probability of reaching the study goals, and compare VFD between  
60

1  
2  
3 treatment groups. Consideration to stopping the trial early by an independent Data and Safety  
4 Monitoring Board (DSMB) will be based on safety concerns, futility, or strong evidence of a  
5  
6 difference between groups for VFD (based on a Haybittle–Peto boundary  $P=0.001$ ). A detailed  
7  
8 analysis plan specifying statistical analyses including health economic analyses will be placed  
9  
10 in the public domain prior to recruitment of the last participant[37].  
11  
12  
13  
14  
15  
16

17 **Biomarker measurements.** Nested sub-studies will be performed in selected samples at sites  
18 performing biobanking (i) to test the impact of the intervention on markers of systemic and  
19 myocardial inflammation; (ii) to compare treatment response between patients depending on  
20 pre-intervention severity assessed by markers of inflammation and organ failure; and (iii) to  
21 biochemically define responders to the intervention (to identify patient subgroups pre-  
22 randomisation that are more likely to respond to a specific treatment). The use of samples/data  
23 will be governed by the study steering board and resulting publications must appropriately  
24 acknowledge the study. Combining a large RCT with a nested biobank is recommended to  
25 maximize scientific knowledge[38].  
26  
27  
28  
29  
30  
31  
32  
33  
34  
35  
36  
37

38 **Health Economic Evaluation.** A within trial economic evaluation will be used to determine  
39 if providing NO is cost-saving compared to usual care from the health system perspective. A  
40 comprehensive cost-effectiveness analysis will be undertaken to determine the level of cost  
41 savings (if any). Length of stay (in PICU and in non-intensive stay) will be the main outcome  
42 variable. Resources used before first discharge will be compared between treatments.  
43  
44  
45  
46  
47  
48  
49  
50  
51  
52  
53  
54

55 **Monitoring.** The study leadership team is responsible for 100% monitoring of investigator and  
56 study nurse credentials, training records, and delegation of responsibility logs, and will review  
57  
58  
59  
60 100% of Consent Forms. CRFs will be compared to source documentation to ensure data are

1  
2  
3 accurate and complete. 100% of source data verification of eligibility criteria and the primary  
4  
5 outcome and the composite secondary outcome of LCOS, ECLS or death will be performed.  
6  
7 An independent monitoring per each site will monitor the data fields required for eligibility,  
8  
9 primary, and secondary study endpoints, and SAEs using primary source verification. In  
10  
11 addition, site visits and regular monitoring of the blood sample storage will be performed.  
12  
13  
14

15  
16 **Patient and Public Involvement.** Consumers and the public were consulted to design a video  
17  
18 informing parents about the study. Patients and the public had no other involvement in study  
19  
20 design.  
21  
22

23  
24  
25 **Ethics.** This protocol and the informed consent document and any subsequent modifications  
26  
27 have been reviewed and approved by the human research ethics committee (Children`s Health  
28  
29 Queensland HREC/17/QRCH/43). This study will be conducted in compliance with the current  
30  
31 version of the protocol. Any change to the protocol document or Informed Consent Form that  
32  
33 affects the scientific intent, study design, patient safety, or may affect a participants`  
34  
35 willingness to continue in the study is considered an amendment, and therefore will be written  
36  
37 and filed as an amendment to this protocol and/or informed consent form. All protocol  
38  
39 deviations must be recorded in the patient record (source document) and on the CRF and must  
40  
41 be reported to the PI. Protocol deviations will be assessed for significance by the Principal  
42  
43 Investigator.  
44  
45  
46

47  
48 Consent will be sought from the parents of every child <2 years of age undergoing CPB for  
49  
50 elective cardiac surgery over the study period. When the family is seen by the surgeons in pre-  
51  
52 assessment clinic (usually days prior to surgery), the study will be mentioned to them by the  
53  
54 surgeon. In addition, the study team will provide study information prior to hospitalisation to  
55  
56 families, including printed study flyers, and links to online study documentation (media  
57  
58 release). Participant confidentiality is strictly held in trust by the participating investigators,  
59  
60

1  
2  
3 research staff, and the sponsoring institution and their agents. The study protocol,  
4 documentation, data and all other information generated will be held in strict confidence.  
5  
6  
7  
8  
9

10 **Significance:** Postoperative paediatric cardiac surgical patients have a high consumption of  
11 intensive care resources and remain at very high risk of major complications, including cardiac  
12 arrest, death, and long-term neurological impairment. Approximately 10% of children with  
13 CHD survive with major neurological sequelae postoperatively, resulting in a massive lifelong  
14 burden for patients, families, healthcare systems, and the society[13]. An attempt to reduce  
15 LCOS and hence perioperative morbidity has the potential to translate not only to a reduction  
16 in intensive care resource utilisation, but also to impact positively on long-term outcomes.  
17 Side-effects from heart surgery for CHD translate into long-term morbidity, persisting into  
18 adult life with a major impact on other family members and society. This study will deliver the  
19 high-level randomised evidence with the potential to show a reduction in postoperative  
20 morbidity and mortality in children with CHD.  
21  
22  
23  
24  
25  
26  
27  
28  
29  
30  
31  
32  
33  
34  
35  
36  
37  
38  
39  
40  
41  
42  
43  
44  
45  
46  
47  
48  
49  
50  
51  
52  
53  
54  
55  
56  
57  
58  
59  
60



1  
2  
3 **Acknowledgements:** The authors would like to thank the parents and children participating in  
4 this trial and the the medical and nursing and research teams in the participating sites for their  
5 help in study setup, recruitment, data collection, and monitoring of study data.  
6  
7  
8  
9

10  
11  
12 **NITRIC Study Group:**  
13

14  
15  
16  
17 Warwick Butt, Steve Horton, Johnny Millar, Carmel Delzoppo, Yves D`Udekem: Cardiac and  
18 Paediatric Intensive Care Services of Royal Children's Hospital, Melbourne, Australia  
19

20  
21  
22 John Beca, David Buckley, Taryn Evans, Claire Sherring, John Artrip: Starship Children's  
23 Hospital Auckland, New Zealand  
24

25  
26  
27 Marino Festa, Killian O`Shaughnessy, David Winlaw, Rebecca Fletcher, Simon Byrne, The  
28 Children's Hospital at Westmead, Sydney, Australia  
29

30  
31  
32 Simon Erickson, Sam Barr, Rae Kelly, David Andrews: Perth Children's Hospital, Perth,  
33 Australia  
34

35  
36  
37 Luregn J Schlapbach, Andreas Schibler, Deborah Long, Kerry Johnston, Carla Zuzak, Nelson  
38 Alphonso, Benjamin Anderson: Queensland Children's Hospital, Brisbane, Australia  
39

40  
41  
42 Antje Blumenthal: The University of Queensland Diamantina Institute, Translational Research  
43 Institute, The University of Queensland, Brisbane, Australia  
44

45  
46  
47 Jonas Fooker, Brenda Gannon: Centre for the Business and Economics of Health, The  
48 University of Queensland, Brisbane, Australia  
49

50  
51  
52 Paul Young: Medical Research Institute of New Zealand, Wellington, New Zealand  
53

54  
55  
56 Mark Jones: School of Public Health, The University of Queensland, Brisbane, Australia  
57  
58  
59  
60

1  
2  
3 Kim van Loon, Nicole JCW van Belle-van Haaren, Bram van Wijk, Erik Koomen, Wilhelmina  
4  
5 Children's Hospital Utrecht, Utrecht, The Netherlands  
6  
7  
8  
9  
10  
11  
12  
13  
14

## 15 REFERENCES

- 16  
17  
18  
19  
20 1. Triedman JK, Newburger JW: **Trends in Congenital Heart Disease: The Next**  
21  
22 **Decade**. *Circulation* 2016, **133**(25):2716-2733.  
23
- 24  
25 2. Erikssen G, Liestol K, Seem E, Birkeland S, Saatvedt KJ, Hoel TN, Dohlen G, Skulstad  
26  
27 H, Svennevig JL, Thaulow E *et al*: **Achievements in congenital heart defect surgery:**  
28  
29 **a prospective, 40-year study of 7038 patients**. *Circulation* 2015, **131**(4):337-346;  
30  
31 discussion 346.  
32
- 33  
34 3. Marelli AJ, Ionescu-Ittu R, Mackie AS, Guo L, Dendukuri N, Kaouache M: **Lifetime**  
35  
36 **prevalence of congenital heart disease in the general population from 2000 to 2010**.  
37  
38 *Circulation* 2014, **130**(9):749-756.  
39
- 40  
41 4. Marelli AJ, Mackie AS, Ionescu-Ittu R, Rahme E, Pilote L: **Congenital heart disease**  
42  
43 **in the general population: changing prevalence and age distribution**. *Circulation*  
44  
45 2007, **115**(2):163-172.  
46
- 47  
48 5. Kaltman JR, Andropoulos DB, Checchia PA, Gaynor JW, Hoffman TM, Laussen PC,  
49  
50 Ohye RG, Pearson GD, Pigula F, Tweddell J *et al*: **Report of the pediatric heart**  
51  
52 **network and national heart, lung, and blood institute working group on the**  
53  
54 **perioperative management of congenital heart disease**. *Circulation* 2010,  
55  
56 **121**(25):2766-2772.  
57  
58  
59  
60

- 1  
2  
3 6. Zahler S, Massoudy P, Hartl H, Hahnel C, Meisner H, Becker BF: **Acute cardiac**  
4 **inflammatory responses to postischemic reperfusion during cardiopulmonary**  
5 **bypass.** *Cardiovasc Res* 1999, **41**(3):722-730.  
6  
7
- 8  
9  
10 7. Levy JH, Tanaka KA: **Inflammatory response to cardiopulmonary bypass.** *Ann*  
11 *Thorac Surg* 2003, **75**(2):S715-720.  
12  
13
- 14  
15 8. Duval EL, Kavelaars A, Veenhuizen L, van Vught AJ, van de Wal HJ, Heijnen CJ:  
16 **Pro- and anti-inflammatory cytokine patterns during and after cardiac surgery in**  
17 **young children.** *Eur J Pediatr* 1999, **158**(5):387-393.  
18  
19
- 20  
21 9. Domanski MJ, Mahaffey K, Hasselblad V, Brener SJ, Smith PK, Hillis G, Engoren M,  
22 Alexander JH, Levy JH, Chaitman BR *et al*: **Association of myocardial enzyme**  
23 **elevation and survival following coronary artery bypass graft surgery.** *JAMA* 2011,  
24 **305**(6):585-591.  
25  
26  
27  
28  
29
- 30  
31 10. Hoffman TM, Wernovsky G, Atz AM, Kulik TJ, Nelson DP, Chang AC, Bailey JM,  
32 Akbary A, Kocsis JF, Kaczmarek R *et al*: **Efficacy and safety of milrinone in**  
33 **preventing low cardiac output syndrome in infants and children after corrective**  
34 **surgery for congenital heart disease.** *Circulation* 2003, **107**(7):996-1002.  
35  
36  
37  
38  
39
- 40  
41 11. Duke T, Stocker C, Butt W: **Monitoring children after cardiac surgery: a minimalist**  
42 **approach might be maximally effective.** *Crit Care Resusc* 2004, **6**(4):306-310.  
43  
44
- 45  
46 12. McElhinney DB, Wernovsky G: **Outcomes of neonates with congenital heart**  
47 **disease.** *Curr Opin Pediatr* 2001, **13**(2):104-110.  
48  
49
- 50  
51 13. Ballweg JA, Wernovsky G, Gaynor JW: **Neurodevelopmental outcomes following**  
52 **congenital heart surgery.** *Pediatr Cardiol* 2007, **28**(2):126-133.  
53  
54
- 55  
56 14. Marino BS: **New concepts in predicting, evaluating, and managing**  
57 **neurodevelopmental outcomes in children with congenital heart disease.** *Curr Opin*  
58 *Pediatr* 2013, **25**(5):574-584.  
59  
60

- 1  
2  
3  
4  
5  
6  
7  
8  
9  
10  
11  
12  
13  
14  
15  
16  
17  
18  
19  
20  
21  
22  
23  
24  
25  
26  
27  
28  
29  
30  
31  
32  
33  
34  
35  
36  
37  
38  
39  
40  
41  
42  
43  
44  
45  
46  
47  
48  
49  
50  
51  
52  
53  
54  
55  
56  
57  
58  
59  
60
15. Marino BS, Lipkin PH, Newburger JW, Peacock G, Gerdes M, Gaynor JW, Mussatto KA, Uzark K, Goldberg CS, Johnson WH, Jr. *et al*: **Neurodevelopmental outcomes in children with congenital heart disease: evaluation and management: a scientific statement from the American Heart Association.** *Circulation* 2012, **126**(9):1143-1172.
  16. Brown MD, Wernovsky G, Mussatto KA, Berger S: **Long-term and developmental outcomes of children with complex congenital heart disease.** *Clin Perinatol* 2005, **32**(4):1043-1057, xi.
  17. Bronicki RA, Backer CL, Baden HP, Mavroudis C, Crawford SE, Green TP: **Dexamethasone reduces the inflammatory response to cardiopulmonary bypass in children.** *Ann Thorac Surg* 2000, **69**(5):1490-1495.
  18. Elhoff JJ, Chowdhury SM, Zyblewski SC, Atz AM, Bradley SM, Graham EM: **Intraoperative Steroid Use and Outcomes Following the Norwood Procedure: An Analysis of the Pediatric Heart Network's Public Database.** *Pediatric critical care medicine : a journal of the Society of Critical Care Medicine and the World Federation of Pediatric Intensive and Critical Care Societies* 2016, **17**(1):30-35.
  19. Hataishi R, Rodrigues AC, Neilan TG, Morgan JG, Buys E, Shiva S, Tambouret R, Jassal DS, Raheer MJ, Furutani E *et al*: **Inhaled nitric oxide decreases infarction size and improves left ventricular function in a murine model of myocardial ischemia-reperfusion injury.** *American journal of physiology Heart and circulatory physiology* 2006, **291**(1):H379-384.
  20. Chello M, Mastroroberto P, Perticone F, Celi V, Colonna A: **Nitric oxide modulation of neutrophil-endothelium interaction: difference between arterial and venous coronary bypass grafts.** *J Am Coll Cardiol* 1998, **31**(4):823-826.

- 1  
2  
3 21. Jones SP, Bolli R: **The ubiquitous role of nitric oxide in cardioprotection.** *J Mol*  
4 *Cell Cardiol* 2006, **40**(1):16-23.  
5  
6  
7  
8 22. Jones SP, Girod WG, Palazzo AJ, Granger DN, Grisham MB, Jourd'Heuil D, Huang  
9 PL, Lefter DJ: **Myocardial ischemia-reperfusion injury is exacerbated in absence of**  
10 **endothelial cell nitric oxide synthase.** *Am J Physiol* 1999, **276**(5 Pt 2):H1567-1573.  
11  
12  
13  
14 23. Minamishima S, Kida K, Tokuda K, Wang H, Sips PY, Kosugi S, Mandeville JB, Buys  
15 ES, Brouckaert P, Liu PK *et al*: **Inhaled nitric oxide improves outcomes after**  
16 **successful cardiopulmonary resuscitation in mice.** *Circulation* 2011, **124**(15):1645-  
17 1653.  
18  
19  
20  
21  
22  
23 24. Schulz R, Kelm M, Heusch G: **Nitric oxide in myocardial ischemia/reperfusion**  
24 **injury.** *Cardiovasc Res* 2004, **61**(3):402-413.  
25  
26  
27  
28 25. Checchia PA, Bronicki RA, Muenzer JT, Dixon D, Raithel S, Gandhi SK, Huddleston  
29 CB: **Nitric oxide delivery during cardiopulmonary bypass reduces postoperative**  
30 **morbidity in children--a randomized trial.** *J Thorac Cardiovasc Surg* 2013,  
31 **146**(3):530-536.  
32  
33  
34  
35  
36  
37 26. James C, Millar J, Horton S, Brizard C, Molesworth C, Butt W: **Nitric oxide**  
38 **administration during paediatric cardiopulmonary bypass: a randomised**  
39 **controlled trial.** *Intensive Care Med* 2016, **42**(11):1744-1752.  
40  
41  
42  
43  
44 27. Harris PA, Taylor R, Thielke R, Payne J, Gonzalez N, Conde JG: **Research electronic**  
45 **data capture (REDCap)--a metadata-driven methodology and workflow process**  
46 **for providing translational research informatics support.** *Journal of biomedical*  
47 *informatics* 2009, **42**(2):377-381.  
48  
49  
50  
51  
52  
53 28. Gaies MG, Jeffries HE, Niebler RA, Pasquali SK, Donohue JE, Yu S, Gall C, Rice TB,  
54 Thiagarajan RR: **Vasoactive-inotropic score is associated with outcome after infant**  
55  
56  
57  
58  
59  
60

- 1  
2  
3 **cardiac surgery: an analysis from the Pediatric Cardiac Critical Care Consortium**  
4 **and Virtual PICU System Registries.** *Pediatr Crit Care Med* 2014, **15**(6):529-537.  
5  
6  
7  
8 29. Gaies MG, Gurney JG, Yen AH, Napoli ML, Gajarski RJ, Ohye RG, Charpie JR,  
9  
10 Hirsch JC: **Vasoactive-inotropic score as a predictor of morbidity and mortality in**  
11 **infants after cardiopulmonary bypass.** *Pediatr Crit Care Med* 2010, **11**(2):234-238.  
12  
13  
14 30. Contentin L, Ehrmann S, Giraudeau B: **Heterogeneity in the definition of mechanical**  
15 **ventilation duration and ventilator-free days.** *Am J Respir Crit Care Med* 2014,  
16 **189**(8):998-1002.  
17  
18  
19 31. Cook D, Lauzier F, Rocha MG, Sayles MJ, Finfer S: **Serious adverse events in**  
20 **academic critical care research.** *CMAJ : Canadian Medical Association journal =*  
21 *journal de l'Association medicale canadienne* 2008, **178**(9):1181-1184.  
22  
23  
24 32. Leteurtre S, Duhamel A, Salleron J, Grandbastien B, Lacroix J, Leclerc F, Groupe  
25 Francophone de Reanimation et d'Urgences P: **PELOD-2: an update of the PEdiatric**  
26 **logistic organ dysfunction score.** *Crit Care Med* 2013, **41**(7):1761-1773.  
27  
28  
29 33. Pollack MM, Holubkov R, Funai T, Clark A, Moler F, Shanley T, Meert K, Newth CJ,  
30 Carcillo J, Berger JT *et al*: **Relationship between the functional status scale and the**  
31 **pediatric overall performance category and pediatric cerebral performance**  
32 **category scales.** *JAMA Pediatr* 2014, **168**(7):671-676.  
33  
34  
35 34. Pierrat V, Marchand-Martin L, Arnaud C, Kaminski M, Resche-Rigon M, Lebeaux C,  
36 Bodeau-Livinec F, Morgan AS, Goffinet F, Marret S *et al*: **Neurodevelopmental**  
37 **outcome at 2 years for preterm children born at 22 to 34 weeks' gestation in France**  
38 **in 2011: EPIPAGE-2 cohort study.** *Bmj* 2017, **358**:j3448.  
39  
40  
41 35. Noeder MM, Logan BA, Struempf KL, Condon N, Mueller I, Sands B, Davies RR,  
42 Sood E: **Developmental screening in children with CHD: Ages and Stages**  
43 **Questionnaires.** *Cardiology in the young* 2017, **27**(8):1447-1454.  
44  
45  
46  
47  
48  
49  
50  
51  
52  
53  
54  
55  
56  
57  
58  
59  
60

- 1  
2  
3 36. Desai AD, Zhou C, Stanford S, Haaland W, Varni JW, Mangione-Smith RM: **Validity**  
4 **and responsiveness of the pediatric quality of life inventory (PedsQL) 4.0 generic**  
5 **core scales in the pediatric inpatient setting.** *JAMA Pediatr* 2014, **168**(12):1114-  
6 1121.  
7  
8  
9  
10  
11  
12 37. Billot L, Venkatesh B, Myburgh J, Finfer S, Cohen J, Webb S, McArthur C, Joyce C,  
13 Bellomo R, Rhodes A *et al*: **Statistical analysis plan for the Adjunctive**  
14 **Corticosteroid Treatment in Critically Ill Patients with Septic Shock (ADRENAL)**  
15 **trial.** *Critical care and resuscitation : journal of the Australasian Academy of Critical*  
16 *Care Medicine* 2017, **19**(2):183-191.  
17  
18  
19  
20  
21  
22  
23 38. Gustafsson F, Atar D, Pitt B, Zannad F, Pfeffer MA, participants in 10th Cardiovascular  
24 Clinical Trialists W: **Maximizing scientific knowledge from randomized clinical**  
25 **trials.** *Am Heart J* 2010, **159**(6):937-943.  
26  
27  
28  
29  
30  
31  
32  
33  
34  
35  
36  
37  
38  
39  
40  
41  
42  
43  
44  
45  
46  
47  
48  
49  
50  
51  
52  
53  
54  
55  
56  
57  
58  
59  
60

1  
2  
3 **Figures**  
4  
5  
6  
7

8 **Figure 1.** Study Flow Diagram.  
9  
10  
11  
12  
13  
14  
15  
16  
17  
18  
19  
20  
21  
22  
23  
24  
25  
26  
27  
28  
29  
30  
31  
32  
33  
34  
35  
36  
37  
38  
39  
40  
41  
42  
43  
44  
45  
46  
47  
48  
49  
50  
51  
52  
53  
54  
55  
56  
57  
58  
59  
60

For peer review only



Table 1: Inclusion and Exclusion criteria

| Patient group                | Criterion                                                                                                                                                                                                                                                                                                                                                                                                                                                                                                                                                                                                                                                                                                                         | Definition                                                                                                                                                                                                                                                                                                                     |
|------------------------------|-----------------------------------------------------------------------------------------------------------------------------------------------------------------------------------------------------------------------------------------------------------------------------------------------------------------------------------------------------------------------------------------------------------------------------------------------------------------------------------------------------------------------------------------------------------------------------------------------------------------------------------------------------------------------------------------------------------------------------------|--------------------------------------------------------------------------------------------------------------------------------------------------------------------------------------------------------------------------------------------------------------------------------------------------------------------------------|
| <b>Inclusion</b>             | <i>Age</i>                                                                                                                                                                                                                                                                                                                                                                                                                                                                                                                                                                                                                                                                                                                        | <ul style="list-style-type: none"> <li>• Postnatal age below 2 years</li> </ul>                                                                                                                                                                                                                                                |
|                              | <i>Procedure</i>                                                                                                                                                                                                                                                                                                                                                                                                                                                                                                                                                                                                                                                                                                                  | <ul style="list-style-type: none"> <li>• Elective Heart surgery</li> <li>• Cardiopulmonary bypass used during surgery</li> </ul>                                                                                                                                                                                               |
|                              | <i>Consent</i>                                                                                                                                                                                                                                                                                                                                                                                                                                                                                                                                                                                                                                                                                                                    | <ul style="list-style-type: none"> <li>• Parental/caregiver consent available prior to surgery</li> </ul>                                                                                                                                                                                                                      |
| <b>Exclusion</b>             | <i>Age</i>                                                                                                                                                                                                                                                                                                                                                                                                                                                                                                                                                                                                                                                                                                                        | <ul style="list-style-type: none"> <li>• Age <math>\geq 2</math> years</li> </ul>                                                                                                                                                                                                                                              |
|                              | <i>Procedure</i>                                                                                                                                                                                                                                                                                                                                                                                                                                                                                                                                                                                                                                                                                                                  | <ul style="list-style-type: none"> <li>• emergency cardiac surgery which may preclude obtaining informed consent (acutely required life-saving procedure in a patient unlikely to survive the next hours without the surgery)</li> <li>• Heart surgery not requiring cardiopulmonary bypass</li> </ul>                         |
|                              | <i>Consent</i>                                                                                                                                                                                                                                                                                                                                                                                                                                                                                                                                                                                                                                                                                                                    | <ul style="list-style-type: none"> <li>• Lack of parental/caregiver consent</li> </ul>                                                                                                                                                                                                                                         |
|                              | <i>Pulmonary hypertension</i>                                                                                                                                                                                                                                                                                                                                                                                                                                                                                                                                                                                                                                                                                                     | <ul style="list-style-type: none"> <li>• persistently elevated pulmonary vascular resistance preoperatively receiving inhaled NO or preoperative intravenous use of drugs involved in the NO pathway such as glyceryl trinitrate within 48 hours prior to CPB (oral sildenafil treatment alone is not an exclusion)</li> </ul> |
| <i>Pre-operative disease</i> | <ul style="list-style-type: none"> <li>• ECLS immediately prior to surgery</li> <li>• Receiving ongoing treatment with antimicrobials for confirmed or suspected sepsis or septic shock diagnosed within 48hours prior to the time of surgery</li> <li>• Treated with high doses of vasoactive drugs defined as a Vasoactive-Inotrope Score (VIS) <math>\geq 15</math> within 24 hours prior to surgery<sup>a</sup></li> <li>• cardiac arrest within one week (7d) prior to surgery</li> <li>• Acute respiratory distress syndrome requiring high frequency oscillatory ventilation within 48 hours prior to surgery</li> <li>• chronic ventilator dependency</li> <li>• pre-existing methaemoglobinemia (MetHb&gt;3%)</li> </ul> |                                                                                                                                                                                                                                                                                                                                |

a) Gaies MG, Gurney JG, Yen AH, *et al*: Vasoactive-inotropic score as a predictor of morbidity and mortality in infants after cardiopulmonary bypass. *Pediatr Crit Care Med* 2010, **11**(2):234-238.

Table 2: Study outcomes

| Outcome                          | Criterion                                                                                                    | Definition                                                                                                                                                                                                                                                                                                                                                                                                                                                                                                                                                                                                                                                                                                                                                                                                                                                                         |
|----------------------------------|--------------------------------------------------------------------------------------------------------------|------------------------------------------------------------------------------------------------------------------------------------------------------------------------------------------------------------------------------------------------------------------------------------------------------------------------------------------------------------------------------------------------------------------------------------------------------------------------------------------------------------------------------------------------------------------------------------------------------------------------------------------------------------------------------------------------------------------------------------------------------------------------------------------------------------------------------------------------------------------------------------|
| <b>Primary</b>                   | <i>Ventilator-free days (VFD)</i>                                                                            | <ul style="list-style-type: none"> <li>duration of respiratory support for all episodes for the first 28 days post randomisation</li> <li>zero value for patients dying within 28 days post randomisation</li> <li>refers to invasive respiratory support with an endotracheal tube in situ</li> </ul>                                                                                                                                                                                                                                                                                                                                                                                                                                                                                                                                                                             |
| <b>Secondary</b>                 | <i>Composite outcome of low cardiac output syndrome (LCOS), Extracorporeal life support (ECLS), or death</i> | <ul style="list-style-type: none"> <li><b>LCOS</b> is defined as one or more of the following<sup>a</sup>: <ul style="list-style-type: none"> <li>Blood lactate level greater than 4 mmol/l with an oxygen extraction of greater than 35% (SaO<sub>2</sub>-ScvO<sub>2</sub> gradient &gt;35%) within the first 48 hours postoperatively</li> <li>a high inotrope requirement defined as Vasoactive-Inotrope Score ≥15 (VIS)<sup>b</sup> where VIS = dopamine dose (mcg/kg/min) + dobutamine dose (mcg/kg/min) + 100 x adrenaline dose (mcg/kg/min) + 100 x noradrenaline dose (mcg/kg/min) + 10 x milrinone dose (mcg/kg/min) + 10,000 x vasopressin dose (U/kg/min).</li> </ul> </li> <li>ECLS is defined as treatment with ECLS during the first 48 hours post randomisation</li> <li>Death is defined as death occurring within the first 28 days post randomisation</li> </ul> |
|                                  | <i>Length of stay</i>                                                                                        | <ul style="list-style-type: none"> <li>Length of stay in paediatric intensive care unit (PICU)</li> <li>Length of stay in hospital</li> </ul>                                                                                                                                                                                                                                                                                                                                                                                                                                                                                                                                                                                                                                                                                                                                      |
|                                  | <i>Costs</i>                                                                                                 | <ul style="list-style-type: none"> <li>Health-care related costs (starting at time of admission to PICU postoperatively)</li> </ul>                                                                                                                                                                                                                                                                                                                                                                                                                                                                                                                                                                                                                                                                                                                                                |
|                                  | <i>Neurodevelopmental and functional outcome at 12 months</i>                                                | <ul style="list-style-type: none"> <li>Ages and Stages Questionnaire (ASQ) scores below threshold for at least one of the five domains measured 12 months post randomisation</li> </ul>                                                                                                                                                                                                                                                                                                                                                                                                                                                                                                                                                                                                                                                                                            |
| <b>Process of care measures</b>  | <i>Severity indicators</i>                                                                                   | <ul style="list-style-type: none"> <li>Treatment with ECLS postoperatively</li> <li>Duration of postoperative time spent with open chest including unplanned chest reopening</li> <li>Treatment and duration of treatment using inhalational nitric oxide postoperatively</li> <li>Treatment and duration of treatment of postoperative renal replacement therapy</li> </ul>                                                                                                                                                                                                                                                                                                                                                                                                                                                                                                       |
| <b>Physiological descriptors</b> | <i>Host inflammation</i>                                                                                     | <ul style="list-style-type: none"> <li>Serum cytokine levels measured during the first 24 hours</li> <li>Inflammation markers measured during the first 24 hours</li> </ul>                                                                                                                                                                                                                                                                                                                                                                                                                                                                                                                                                                                                                                                                                                        |
|                                  | <i>Myocardial injury</i>                                                                                     | <ul style="list-style-type: none"> <li>Levels of postoperative serum troponin levels measured during the first 24 hours</li> </ul>                                                                                                                                                                                                                                                                                                                                                                                                                                                                                                                                                                                                                                                                                                                                                 |
|                                  | <i>Organ dysfunction</i>                                                                                     | <ul style="list-style-type: none"> <li>Severity and duration of postoperative organ dysfunction measured by PELOD-2</li> <li>postoperative Acute Kidney Injury and serum creatinine levels measured during the first 24 hours</li> </ul>                                                                                                                                                                                                                                                                                                                                                                                                                                                                                                                                                                                                                                           |

- severity and duration of postoperative delirium

- a) Hoffman TM, Wernovsky G, Atz AM, *et al*: Efficacy and safety of milrinone in preventing low cardiac output syndrome in infants and children after corrective surgery for congenital heart disease. *Circulation* 2003, 107(7):996-1002.
- b) Gaies MG, Gurney JG, Yen AH, *et al*: Vasoactive-inotropic score as a predictor of morbidity and mortality in infants after cardiopulmonary bypass. *Pediatr Crit Care Med* 2010, 11(2):234-238.

For peer review only

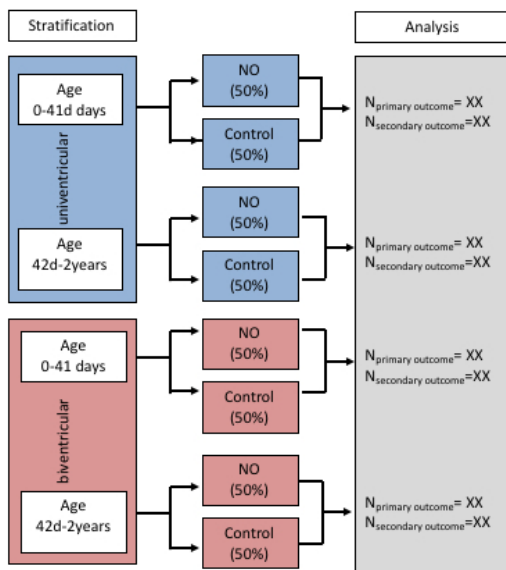

Figure 1

254x190mm (72 x 72 DPI)

# BMJ Open

## Study Protocol: NITric oxide during cardiopulmonary bypass to improve Recovery in Infants with Congenital heart defects (NITRIC trial): A Randomised Controlled Trial.

|                                 |                                                                                                                                                                                                                                                                                                                                                                                                                                                                                                                                                                                                                                                                                                                                                                                                                                                                                                                                                                                                                                                                                                                                                                                                                                                                                                                                                                                                                                                                                                                                                                                                                                                                            |
|---------------------------------|----------------------------------------------------------------------------------------------------------------------------------------------------------------------------------------------------------------------------------------------------------------------------------------------------------------------------------------------------------------------------------------------------------------------------------------------------------------------------------------------------------------------------------------------------------------------------------------------------------------------------------------------------------------------------------------------------------------------------------------------------------------------------------------------------------------------------------------------------------------------------------------------------------------------------------------------------------------------------------------------------------------------------------------------------------------------------------------------------------------------------------------------------------------------------------------------------------------------------------------------------------------------------------------------------------------------------------------------------------------------------------------------------------------------------------------------------------------------------------------------------------------------------------------------------------------------------------------------------------------------------------------------------------------------------|
| Journal:                        | <i>BMJ Open</i>                                                                                                                                                                                                                                                                                                                                                                                                                                                                                                                                                                                                                                                                                                                                                                                                                                                                                                                                                                                                                                                                                                                                                                                                                                                                                                                                                                                                                                                                                                                                                                                                                                                            |
| Manuscript ID                   | bmjopen-2018-026664.R1                                                                                                                                                                                                                                                                                                                                                                                                                                                                                                                                                                                                                                                                                                                                                                                                                                                                                                                                                                                                                                                                                                                                                                                                                                                                                                                                                                                                                                                                                                                                                                                                                                                     |
| Article Type:                   | Protocol                                                                                                                                                                                                                                                                                                                                                                                                                                                                                                                                                                                                                                                                                                                                                                                                                                                                                                                                                                                                                                                                                                                                                                                                                                                                                                                                                                                                                                                                                                                                                                                                                                                                   |
| Date Submitted by the Author:   | 15-May-2019                                                                                                                                                                                                                                                                                                                                                                                                                                                                                                                                                                                                                                                                                                                                                                                                                                                                                                                                                                                                                                                                                                                                                                                                                                                                                                                                                                                                                                                                                                                                                                                                                                                                |
| Complete List of Authors:       | Schlapbach, Luregn; The University of Queensland, Paediatric Critical Care Research Group<br>Horton, Stephen; Royal Children's Hospital M, Cardiac Surgical Unit; University of Melbourne, Faculty of Medicine<br>Long, Debbie; Queensland Health, Lady Cilento Children's Hospital; Menzies Health Institute Queensland, Alliance for Vascular Access Teaching and Research Group<br>Beca, John; Starship Children's Hospital, Paediatric Intensive Care Unit<br>Erickson, Simon; Perth Children's Hospital, Paediatric Critical Care<br>Festa, Marino<br>d'Udekem, Yves; Royal Children's Hospital M, Cardiac Surgical Unit; University of Melbourne, Faculty of Medicine<br>Alphonso, Nelson; The University of Queensland, Paediatric Critical Care Research Group; Queensland Health, Lady Cilento Children's Hospital<br>Winlaw, David; The Children's Hospital at Westmead, Sydney Children's Hospital Network, Heart Centre for Children<br>Johnson, Kerry; Queensland Health, Lady Cilento Children's Hospital<br>Delzoppo, Carmel; Royal Children's Hospital M, Cardiac Surgical Unit<br>van Loon, Kim; University Medical Center Utrecht<br>Gannon, B; The University of Queensland, Centre for Business and Economics of Health<br>Fooker, Jonas; The University of Queensland, Centre for Business and Economics of Health<br>Blumenthal, Antje; The University of Queensland, Diamantina Institute<br>Young, Paul ; Wellington Hospital,<br>Jones, Mark; Bond University<br>Butt, Warwick; Royal Children's Hospital M, Cardiac Surgical Unit<br>Schibler, Andreas; Queensland University of Technology; Queensland Health, Lady Cilento Children's Hospital |
| <b>Primary Subject Heading</b>: | Intensive care                                                                                                                                                                                                                                                                                                                                                                                                                                                                                                                                                                                                                                                                                                                                                                                                                                                                                                                                                                                                                                                                                                                                                                                                                                                                                                                                                                                                                                                                                                                                                                                                                                                             |
| Secondary Subject Heading:      | Cardiovascular medicine, Health economics, Paediatrics                                                                                                                                                                                                                                                                                                                                                                                                                                                                                                                                                                                                                                                                                                                                                                                                                                                                                                                                                                                                                                                                                                                                                                                                                                                                                                                                                                                                                                                                                                                                                                                                                     |
| Keywords:                       | infant, Cardiac surgery < SURGERY, mortality, nitric oxide, cardiopulmonary bypass, inflammation                                                                                                                                                                                                                                                                                                                                                                                                                                                                                                                                                                                                                                                                                                                                                                                                                                                                                                                                                                                                                                                                                                                                                                                                                                                                                                                                                                                                                                                                                                                                                                           |
|                                 |                                                                                                                                                                                                                                                                                                                                                                                                                                                                                                                                                                                                                                                                                                                                                                                                                                                                                                                                                                                                                                                                                                                                                                                                                                                                                                                                                                                                                                                                                                                                                                                                                                                                            |

1  
2  
3  
4  
5  
6  
7  
8  
9  
10  
11  
12  
13  
14  
15  
16  
17  
18  
19  
20  
21  
22  
23  
24  
25  
26  
27  
28  
29  
30  
31  
32  
33  
34  
35  
36  
37  
38  
39  
40  
41  
42  
43  
44  
45  
46  
47  
48  
49  
50  
51  
52  
53  
54  
55  
56  
57  
58  
59  
60

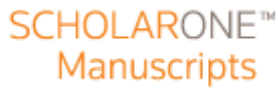

1  
2  
3 **Title Page:**  
4

5 **Study Protocol: NITric oxide during cardiopulmonary bypass to improve Recovery in**  
6  
7 **Infants with Congenital heart defects (NITRIC trial): A Randomised Controlled Trial.**  
8  
9

10  
11  
12 Authors, highest degree and affiliations:  
13

- 14  
15 - Luregn J Schlapbach, MD, FCICM, Paediatric Critical Care Research Group, Child  
16 Health Research Institute, The University of Queensland; Paediatric Intensive Care  
17 Unit, Queensland Children's Hospital, Children's Health Queensland, Brisbane,  
18 Australia. Email: l.schlapbach@uq.edu.au  
19  
20  
21  
22  
23 - Stephen B Horton PhD, Cardiac Surgical Unit, Royal Children's Hospital, Melbourne.  
24 Faculty of Medicine, Department of Paediatrics, University of Melbourne. Honorary  
25 Research Fellow, Murdoch Children's Research Institute, Melbourne, Australia. Email:  
26 Steve.Horton@rch.org.au  
27  
28  
29  
30  
31  
32 - Debbie Long, PhD, Paediatric Critical Care Research Group, Child Health Research  
33 Institute, The University of Queensland; Paediatric Intensive Care Unit, Queensland  
34 Children's Hospital, Children's Health Queensland, Brisbane, Australia. Email:  
35 Debbie.Long2@health.qld.gov.au  
36  
37  
38  
39  
40  
41 - John Beca, MBChB, FCICM. FRACP, Paediatric Intensive Care Unit, Starship  
42 Children's Hospital, Auckland, New Zealand. Email: JohnBeca@adhb.govt.nz  
43  
44  
45  
46 - Simon Erickson, MBBS FCICM, Paediatric Critical Care, Perth Children's Hospital,  
47 Western Australia and The University of Western Australia. Email:  
48 Simon.Erickson@health.wa.gov.au  
49  
50  
51  
52 - Marino Festa, MD, FCICM, Kids Critical Care Research, Paediatric Intensive Care  
53 Unit, Children's Hospital at Westmead, Sydney Children's Hospital Network, Sydney,  
54 New South Wales, Australia. Email: marino.festa@health.nsw.gov.au  
55  
56  
57  
58  
59  
60

- 1  
2  
3 - Yves d'Udekem, MD, PhD, Department of Cardiac Surgery, Royal Children's  
4 Hospital, Melbourne, Australia; Heart Research, Murdoch Childrens Research  
5 Institute, Melbourne, Australia; Department of Paediatrics, The University of  
6 Melbourne, Melbourne, Australia. Email: Yves.Dudekem@rch.org.au  
7  
8  
9  
10  
11  
12 - Nelson Alphonso, FRCS (C.Th), FRACS, Cardiac Surgery, Queensland Children's  
13 Hospital, and Associate Professor, School of Medicine, Children's Health Clinical  
14 Unit, University of Queensland, Brisbane, Queensland, Australia. Email:  
15 nelson.alphonso@health.qld.gov.au  
16  
17  
18  
19  
20  
21 - David Winlaw MBBS, MD, FRACS, Heart Centre for Children, The Children's  
22 Hospital at Westmead, Sydney Children's Hospital Network, and Faculty of Medicine  
23 and Health, University of Sydney, Sydney, Australia. Email:  
24 david.winlaw@health.nsw.gov.au  
25  
26  
27  
28  
29  
30 - Kerry Johnson, Paediatric Critical Care Research Group, Child Health Research  
31 Institute, The University of Queensland; Paediatric Intensive Care Unit, Queensland  
32 Children's Hospital, Children's Health Queensland, Brisbane, Australia. Email:  
33 Kerry.Johnson3@health.qld.gov.au  
34  
35  
36  
37  
38  
39 - Carmel Delzoppo, BHS, Paediatric Intensive Care Unit Royal Children's Hospital  
40 Melbourne, Murdoch Children's Research Institute. Email:  
41 Carmel.Delzoppo@rch.org.au  
42  
43  
44  
45  
46  
47 - Kim van Loon, MD, PhD, Division of Anaesthetics, University Medical Center Utrecht  
48 Utrecht, the Netherlands. Email: k.vanloon1@gmail.com  
49  
50  
51 - Brenda Gannon, PhD, Professor of Health Economics, Centre for the Business and  
52 Economics of Health, The University of Queensland, Brisbane, Australia.  
53  
54  
55  
56  
57  
58  
59  
60



- 1  
2  
3 - Jonas Foooken, PhD, Centre for the Business and Economics of Health, The University  
4 of Queensland, Brisbane, Australia. Email: [j.foooken@uq.edu.au](mailto:j.foooken@uq.edu.au)  
5  
6  
7  
8 - Antje Blumenthal, Dr rer. nat., Associate Professor and Head of the Infection and  
9 Inflammation Group at The University of Queensland Diamantina Institute, The  
10 University of Queensland, Translational Research Institute, Brisbane, Australia. Email:  
11  
12  
13  
14  
15  
16  
17 - Paul Young, MBChB, FCICM, PhD, Director of the Intensive Care Research  
18 Programme, Medical Research Institute of New Zealand, Wellington, New Zealand  
19  
20  
21  
22  
23  
24  
25  
26  
27  
28  
29  
30  
31  
32  
33  
34  
35  
36  
37  
38  
39  
40  
41  
42  
43  
44  
45  
46  
47  
48  
49  
50  
51  
52  
53  
54  
55  
56  
57  
58  
59  
60
- Mark Jones, PhD, School of Public Health, Bond University, South Port, Australia.  
Email: [majones@bond.edu.au](mailto:majones@bond.edu.au)
  - Warwick Butt, Associate Professor, MB B.S, FRACP, FJFICM, FCICM. Paediatric  
Intensive Care Unit Royal Children's Hospital Melbourne, Murdoch Children's  
Research Institute, Melbourne University. Email: [Warwick.Butt@rch.org.au](mailto:Warwick.Butt@rch.org.au)
  - Andreas Schibler, MD, FCICM, Paediatric Critical Care Research Group, Child Health  
Research Institute, The University of Queensland; Paediatric Intensive Care Unit,  
Queensland Children's Hospital, Children's Health Queensland, Brisbane, Australia.  
Email: [a.schibler@uq.edu.au](mailto:a.schibler@uq.edu.au)

**On behalf of the NITRIC Study Group, the Australian and New Zealand Intensive Care  
Society Clinical Trials Group (ANZICS CTG), the Paediatric Critical Care Research  
group (PCCRG) and the ANZICS Paediatric Study Group (PSG)**

## **Correspondence**

1  
2  
3 A/Prof Andreas Schibler, MD, FCICM  
4

5 Paediatric Critical Care Research Group (PCCRG), Child Health Research Centre, Queensland  
6  
7 Children's Hospital Precinct and Mater Research Institute, The University of Queensland Level  
8  
9  
10 7, 62 Graham St, South Brisbane, Queensland, 4101, Australia  
11

12 Email: [a.schibler@uq.edu.au](mailto:a.schibler@uq.edu.au)  
13

14 Phone: ++61 (0) 7 3068 11 11  
15  
16  
17  
18

19 *Alternative correspondence:*  
20

21 A/Prof Luregn J. Schlapbach, MD, FCICM  
22

23 Paediatric Critical Care Research Group, Child Health Research Institute, The University of  
24  
25 Queensland; and Queensland Children's Hospital, Children's Health Queensland, The  
26  
27 University of Queensland Level 7, 62 Graham St, South Brisbane, Queensland, 4101, Australia  
28  
29

30 Email: [l.schlapbach@uq.edu.au](mailto:l.schlapbach@uq.edu.au)  
31

32 Phone: ++61 (0) 7 3068 11 11  
33  
34  
35  
36  
37  
38  
39

40 **Conflict of Interest Statement:**  
41

42 Yves d'Udekem is a consultant for MSD and Actelion.  
43

44 LJS, SH, DL, KJ, NA, DW, MF, SE, JB, CD, KL, MJ, AF, BG, AB, PY, WB, AS have no  
45  
46 conflicts of interest to declare.  
47  
48  
49  
50

51 **Word count:** 3441  
52  
53  
54  
55

56 **Key words:** cardiopulmonary bypass; child; congenital heart disease; infant; inflammation;  
57  
58 ventilation; nitric oxide; mortality  
59  
60

**Abbreviations:**

|                   |                                  |
|-------------------|----------------------------------|
| CPB               | Cardio Pulmonary Bypass          |
| CHD               | Congenital Heart Disease         |
| ECLS              | Extracorporeal Life Support      |
| FiO <sub>2</sub>  | Fraction of inspired oxygen      |
| CO <sub>2</sub>   | Carbon dioxide                   |
| NO                | Nitric oxide                     |
| SaO <sub>2</sub>  | Arterial oxygen saturation       |
| ScvO <sub>2</sub> | Central venous oxygen saturation |
| PICU              | Paediatric Intensive Care Unit   |

**Study Protocol: NITric oxide during cardiopulmonary bypass to improve Recovery in Infants with Congenital heart defects (NITRIC trial): A Randomised Controlled Trial.**

Trial registration: ACTRN12617000821392

Protocol Version 1.3, dated 17<sup>th</sup> July 2018

**Funding sources:** This work was supported by grants from the Heart Kids Foundation, Australia; the Children's Health Foundation, Brisbane, Australia; and by a grant from the Australian National Health and Medical Research Council (1140322).

Luregn Schlapbach, Yves d'Udekem, Andreas Schibler hold a NHMRC Clinical Practitioner Fellowship. The Victorian Government's Operational Infrastructure Support Program

1  
2  
3 supported this research project. Paul Young holds a Clinical Practitioner Fellowship from the  
4  
5 Health Research Council of New Zealand.  
6  
7  
8  
9

10 The funding sources had no involvement in study design, analyses, nor interpretation of the  
11  
12 results.  
13

14 Mallinckrodt Pharmaceuticals will provide nitric oxide delivery devices to study centres but  
15  
16 has no involvement in study design, conduct, nor analyses.  
17  
18  
19  
20  
21  
22  
23  
24  
25  
26  
27

28 **Author contributorship statement:**  
29

30 The study protocol first draft was designed by LJS and AS based on the previous pilot study  
31  
32 design established by SH, and WB. MJ wrote the section on statistical analyses. JF and BG  
33  
34 wrote the section on health economic analyses The present study protocol has been revised  
35  
36 with input from SH, DL, JB, SE, MF, YdU, NA, DW, KJ, CD, KvL, BG, JF, PY, AB, MJ and  
37  
38 WB. LJS prepared the final protocol manuscript which was reviewed and approved by all  
39  
40 authors.  
41  
42  
43  
44  
45  
46  
47  
48  
49  
50  
51  
52  
53  
54  
55  
56  
57  
58  
59  
60

## Abstract

**Introduction:** Congenital heart disease (CHD) is a major cause of infant mortality. Many infants with CHD require corrective surgery with most operations requiring cardiopulmonary bypass (CPB). CPB triggers a systemic inflammatory response which is associated with low cardiac output syndrome (LCOS), post-operative morbidity and mortality. Delivery of nitric oxide (NO) into CPB circuits can provide myocardial protection and reduce bypass-induced inflammation, leading to less LCOS and improved recovery. We hypothesized that using NO during CPB increases ventilator-free days (the number of days patients spend alive and free from invasive mechanical ventilation up until day 28) compared with standard care. Here we describe the NITRIC trial protocol.

**Methods and Analysis:** The NITRIC trial is a randomised, double blind, controlled, parallel-group, two-sided superiority trial to be conducted in at least five paediatric cardiac surgical centres. One thousand three-hundred and twenty infants below two years of age undergoing cardiac surgery with CPB will be randomly assigned to NO at 20ppm administered into the CPB oxygenator for the duration of CPB or standard care (no NO) in a 1:1 ratio with stratification by age (<six weeks  $\geq$ six weeks), single ventricle physiology (Y/N), and study centre. The primary outcome will be ventilator-free days to day 28. Secondary outcomes include a composite of LCOS, need for extracorporeal membrane oxygenation, or death within 28 days of surgery; length of stay in intensive care and in hospital; and, health care costs. Analyses will be conducted on an intention to treat basis. Pre-planned secondary analyses will investigate the impact of NO on host inflammatory profiles post-surgery.

**Ethics and dissemination:** The study has ethical approval (HREC/17/QRCH/43, dated 26<sup>th</sup> April 2017), is registered in the Australian New Zealand Clinical Trials Registry (ACTRN12617000821392), and commenced recruitment in July 2017. The primary manuscript will be submitted for publication in a peer reviewed journal.

**Strengths and limitations of this study:**

- This study tests the efficacy and safety of a simple intervention during cardiopulmonary bypass to improve early postoperative morbidity.
- The intervention aims to reduce patient-centred adverse outcomes after a common high-risk procedure for the most common congenital condition.
- The study includes follow-up of neurodevelopmental outcome and quality of life which will allow assessment of the long-term impact of the intervention.
- The study includes biobanking to investigate the biological mechanisms underlying the clinical findings in ancillary studies.
- The study will be the largest randomised controlled trial performed in paediatric cardiac surgery to date.

## Introduction

Congenital heart disease (CHD) is the most common congenital condition, affecting around one in a hundred live born children[1]. Up to 50% need cardiac surgery to correct the underlying abnormality at some stage during their life, with the majority of procedures requiring cardiopulmonary bypass (CPB). Substantial reductions in perioperative mortality in children following cardiac surgery have been achieved[2], and adult survivors of CHD now outnumber paediatric patients with CHD in most high income countries[3, 4]. Despite these advances, major postoperative morbidity remains common and is associated with increased rate of long term mortality, morbidity, and disability[5]. The exposure of host blood to large artificial organ surfaces combined with myocardial injury during surgery, results in a strong systemic inflammatory response of the host, which is further aggravated by reperfusion injury and the release of damage-associated molecular patterns during surgery[6]. Endotoxin release, leukocyte and complement activation, widespread activation of inflammatory mediators, and endothelial leak[7] postoperatively contribute to low cardiac output syndrome (LCOS) [8, 9]. Postoperative LCOS is clinically defined by a need for inotropes to maintain end organ perfusion, an increased arterial-venous oxygen extraction, lactataemia, and oliguria. LCOS may lead to multi-organ failure and a need for extracorporeal life support (ECLS)[10]. Several studies have shown that the presence and severity of LCOS, which affects 25-40% of children post CPB in the first hours following heart surgery[11], is strongly associated with postoperative morbidity and mortality. CPB-related side effects are most pronounced in infants and young children[12] due to their higher metabolic requirement, altered inflammatory response, and higher CPB circuit to patient blood volume. At the same time, this age group is exposed to CPB during a vulnerable phase of brain development [13-15] and remains at highest risk of suffering neurological impairments[16] due to acute brain injury occurring within the context of LCOS. Recent trials to reduce LCOS during cardiac surgery for CHD testing

1  
2  
3 interventions such as steroids[17] have not demonstrated consistent benefit[18]. Given the  
4 adverse effects of cardiopulmonary bypass on early recovery and long-term neurodevelopment  
5 there remains an urgent need for clinical trials evaluating novel therapies to address these  
6  
7  
8  
9  
10 problems[5].

11  
12 Nitric oxide (NO) is an endogenous anti-inflammatory mediator[19] and is essential to regulate  
13 endothelial function and microvascular inflammation[20]. Several studies have demonstrated  
14 that exogenous NO can reduce myocardial damage in clinical and experimental settings of  
15 ischaemia and reperfusion[21-24]. A previous small single centre study in 16 children reported  
16 a reduction in bypass-induced inflammation using gaseous NO delivered at 20ppm to CPB  
17 circuits[25]. The duration of mechanical ventilation was significantly shorter (8.4 versus 16.3  
18 hours;  $P < .05$ ) and so was ICU length of stay (53.8 versus 79.4 hours;  $P < .05$ ) in children  
19 receiving NO compared to the placebo group. We have previously reported the feasibility and  
20 safety of NO delivery to CPB in a single centre randomized controlled pilot study in 198 infants  
21 and children (0-16 years) undergoing cardiac surgery[26]. This pilot study demonstrated a  
22 statistically significantly lower proportion of children with a LCOS in the intervention arm, a  
23 reduced requirement for ECLS, and a trend to reduced length of stay, and shorter duration of  
24 mechanical ventilation. The effect was greatest in children under two years of age, with the  
25 greatest treatment benefit observed in children under six weeks.

26  
27 Accordingly, we designed the NITRIC trial to test the primary hypothesis that, in infants under  
28 two years having cardiac surgery, using NO during CPB increases ventilator-free days (the  
29 number of days patients spend alive and free from invasive mechanical ventilation up until  
30 post-operative day 28) compared with standard care. Here we describe the NITRIC trial  
31  
32  
33  
34  
35  
36  
37  
38  
39  
40  
41  
42  
43  
44  
45  
46  
47  
48  
49  
50  
51  
52  
53  
54  
55  
56  
57  
58  
59  
60  
61  
62  
63  
64  
65  
66  
67  
68  
69  
70  
71  
72  
73  
74  
75  
76  
77  
78  
79  
80  
81  
82  
83  
84  
85  
86  
87  
88  
89  
90  
91  
92  
93  
94  
95  
96  
97  
98  
99  
100  
101  
102  
103  
104  
105  
106  
107  
108  
109  
110  
111  
112  
113  
114  
115  
116  
117  
118  
119  
120  
121  
122  
123  
124  
125  
126  
127  
128  
129  
130  
131  
132  
133  
134  
135  
136  
137  
138  
139  
140  
141  
142  
143  
144  
145  
146  
147  
148  
149  
150  
151  
152  
153  
154  
155  
156  
157  
158  
159  
160  
161  
162  
163  
164  
165  
166  
167  
168  
169  
170  
171  
172  
173  
174  
175  
176  
177  
178  
179  
180  
181  
182  
183  
184  
185  
186  
187  
188  
189  
190  
191  
192  
193  
194  
195  
196  
197  
198  
199  
200  
201  
202  
203  
204  
205  
206  
207  
208  
209  
210  
211  
212  
213  
214  
215  
216  
217  
218  
219  
220  
221  
222  
223  
224  
225  
226  
227  
228  
229  
230  
231  
232  
233  
234  
235  
236  
237  
238  
239  
240  
241  
242  
243  
244  
245  
246  
247  
248  
249  
250  
251  
252  
253  
254  
255  
256  
257  
258  
259  
260  
261  
262  
263  
264  
265  
266  
267  
268  
269  
270  
271  
272  
273  
274  
275  
276  
277  
278  
279  
280  
281  
282  
283  
284  
285  
286  
287  
288  
289  
290  
291  
292  
293  
294  
295  
296  
297  
298  
299  
300  
301  
302  
303  
304  
305  
306  
307  
308  
309  
310  
311  
312  
313  
314  
315  
316  
317  
318  
319  
320  
321  
322  
323  
324  
325  
326  
327  
328  
329  
330  
331  
332  
333  
334  
335  
336  
337  
338  
339  
340  
341  
342  
343  
344  
345  
346  
347  
348  
349  
350  
351  
352  
353  
354  
355  
356  
357  
358  
359  
360  
361  
362  
363  
364  
365  
366  
367  
368  
369  
370  
371  
372  
373  
374  
375  
376  
377  
378  
379  
380  
381  
382  
383  
384  
385  
386  
387  
388  
389  
390  
391  
392  
393  
394  
395  
396  
397  
398  
399  
400  
401  
402  
403  
404  
405  
406  
407  
408  
409  
410  
411  
412  
413  
414  
415  
416  
417  
418  
419  
420  
421  
422  
423  
424  
425  
426  
427  
428  
429  
430  
431  
432  
433  
434  
435  
436  
437  
438  
439  
440  
441  
442  
443  
444  
445  
446  
447  
448  
449  
450  
451  
452  
453  
454  
455  
456  
457  
458  
459  
460  
461  
462  
463  
464  
465  
466  
467  
468  
469  
470  
471  
472  
473  
474  
475  
476  
477  
478  
479  
480  
481  
482  
483  
484  
485  
486  
487  
488  
489  
490  
491  
492  
493  
494  
495  
496  
497  
498  
499  
500  
501  
502  
503  
504  
505  
506  
507  
508  
509  
510  
511  
512  
513  
514  
515  
516  
517  
518  
519  
520  
521  
522  
523  
524  
525  
526  
527  
528  
529  
530  
531  
532  
533  
534  
535  
536  
537  
538  
539  
540  
541  
542  
543  
544  
545  
546  
547  
548  
549  
550  
551  
552  
553  
554  
555  
556  
557  
558  
559  
560  
561  
562  
563  
564  
565  
566  
567  
568  
569  
570  
571  
572  
573  
574  
575  
576  
577  
578  
579  
580  
581  
582  
583  
584  
585  
586  
587  
588  
589  
590  
591  
592  
593  
594  
595  
596  
597  
598  
599  
600  
601  
602  
603  
604  
605  
606  
607  
608  
609  
610  
611  
612  
613  
614  
615  
616  
617  
618  
619  
620  
621  
622  
623  
624  
625  
626  
627  
628  
629  
630  
631  
632  
633  
634  
635  
636  
637  
638  
639  
640  
641  
642  
643  
644  
645  
646  
647  
648  
649  
650  
651  
652  
653  
654  
655  
656  
657  
658  
659  
660  
661  
662  
663  
664  
665  
666  
667  
668  
669  
670  
671  
672  
673  
674  
675  
676  
677  
678  
679  
680  
681  
682  
683  
684  
685  
686  
687  
688  
689  
690  
691  
692  
693  
694  
695  
696  
697  
698  
699  
700  
701  
702  
703  
704  
705  
706  
707  
708  
709  
710  
711  
712  
713  
714  
715  
716  
717  
718  
719  
720  
721  
722  
723  
724  
725  
726  
727  
728  
729  
730  
731  
732  
733  
734  
735  
736  
737  
738  
739  
740  
741  
742  
743  
744  
745  
746  
747  
748  
749  
750  
751  
752  
753  
754  
755  
756  
757  
758  
759  
760  
761  
762  
763  
764  
765  
766  
767  
768  
769  
770  
771  
772  
773  
774  
775  
776  
777  
778  
779  
780  
781  
782  
783  
784  
785  
786  
787  
788  
789  
790  
791  
792  
793  
794  
795  
796  
797  
798  
799  
800  
801  
802  
803  
804  
805  
806  
807  
808  
809  
810  
811  
812  
813  
814  
815  
816  
817  
818  
819  
820  
821  
822  
823  
824  
825  
826  
827  
828  
829  
830  
831  
832  
833  
834  
835  
836  
837  
838  
839  
840  
841  
842  
843  
844  
845  
846  
847  
848  
849  
850  
851  
852  
853  
854  
855  
856  
857  
858  
859  
860  
861  
862  
863  
864  
865  
866  
867  
868  
869  
870  
871  
872  
873  
874  
875  
876  
877  
878  
879  
880  
881  
882  
883  
884  
885  
886  
887  
888  
889  
890  
891  
892  
893  
894  
895  
896  
897  
898  
899  
900  
901  
902  
903  
904  
905  
906  
907  
908  
909  
910  
911  
912  
913  
914  
915  
916  
917  
918  
919  
920  
921  
922  
923  
924  
925  
926  
927  
928  
929  
930  
931  
932  
933  
934  
935  
936  
937  
938  
939  
940  
941  
942  
943  
944  
945  
946  
947  
948  
949  
950  
951  
952  
953  
954  
955  
956  
957  
958  
959  
960  
961  
962  
963  
964  
965  
966  
967  
968  
969  
970  
971  
972  
973  
974  
975  
976  
977  
978  
979  
980  
981  
982  
983  
984  
985  
986  
987  
988  
989  
990  
991  
992  
993  
994  
995  
996  
997  
998  
999  
1000



## METHODS

The NITRIC trial is a 1320-patient multicentre, randomised, double-blind, standard care-controlled, parallel-group, trial in infants and children < 2 years of age undergoing open heart surgery on CPB (**Figure 1**).

**Study setting.** Tertiary/quaternary paediatric cardiac surgical services in Australia and New Zealand, including Cardiac and Paediatric Intensive Care Services of Royal Children's Hospital, Melbourne; Starship Children's Hospital Auckland NZ; The Children's Hospital at Westmead, Sydney; Princess Margaret Hospital for Children, Perth; and Queensland Children's Hospital, Brisbane. Addition of a further international study site is in progress.

**Participants.** Eligible children will be identified in the pre-operative clinics, in the general cardiac wards or in the neonatal or paediatric intensive care unit. *Included* will be infants and children < 2 years of age undergoing elective open heart surgery on CPB where consent of parents/guardian is obtained prior to surgery. The *exclusion criteria* relate to patient characteristics that will interfere with consent, with the intervention, or with measurement of the primary and secondary outcomes. Inclusion and exclusion criteria are shown in **Table 1**.

*Enrolment of patients undergoing repeated surgery during the first two years of life:* In order to assess the impact of the intervention on long-term outcomes, patients who were previously enrolled and randomised into the study who require a second or subsequent surgical procedure (such as a patient with single ventricle physiology requiring a staged palliation) will undergo the same treatment allocation for subsequent surgeries requiring CPB, unless parents opt out. Patients who were not recruited into the study during their first procedure, but are scheduled for a subsequent procedure requiring CPB prior to their second birthday, will be eligible for recruitment.

1  
2  
3 **Randomisation and Blinding.** Treatment assignment will be performed using a secure,  
4 centralised, web-based randomisation interface (REDCap [27], The University of Queensland).  
5  
6 The allocation sequence will be generated by the study statistician using computer-generated  
7 random numbers using a variable block size stratified by age (< six weeks, six weeks to 24  
8 months), univentricular versus biventricular lesions, and by site. Of the investigating team,  
9 only the study perfusionist will be aware of the randomisation and NO delivery. Cardiologists,  
10 cardiac surgeons, anesthesiologists, intensivists, PICU nurses, research assistants, data  
11 analysts, and parents and caregivers will be blinded for the intervention. *Rationale for*  
12 *stratification:* The age group under six weeks represents the cohort at highest surgical risk. In  
13 the pilot study the effect size of the NO delivery was greatest in these infants[26]. Cardiac  
14 physiology (univentricular versus biventricular) is a major determinant of surgical complexity,  
15 risk, and outcome[1, 5].

16  
17 **Blinding of the Intervention.** Blinding arrangements in the operating theatre will be achieved  
18 by covering the NO delivery system with drapes. The dedicated study NO delivery system will  
19 be connected to the CPB oxygenator at all times, independent of randomisation. The family,  
20 surgeons, anaesthetists and PICU staff will be not aware of the treatment arm a patient is  
21 allocated to. The perfusionists will be advised that all aspects of CPB except for provision of  
22 NO (or not) should be performed according to standard institutional practice for study  
23 participants.

24  
25 **Interventions.** Infants will be randomly assigned to NO or standard care. Those allocated to  
26 the *NO arm* will receive NO during CPB blended into the fresh gas flow of the CPB  
27 oxygenator, which is kept at 3L/min. NO levels are maintained at 20 ppm using a NO delivery  
28 system (Ikaria INOmax DSIR, Ikaria, NJ, USA) or similar device. Continuous sampling of NO  
29 and NO<sub>2</sub> concentration will be undertaken from an access port before the oxygenator. NO will  
30 be started immediately when the patient is placed on CPB and ceased once weaned off CPB.

1  
2  
3 Patients allocated to the *standard study arm* will receive the standard gase oxygen-air mix into  
4 the CPB oxygenator at a flow rate of 3L/min. If patients require several CPB runs during the  
5 same procedure, the study treatment will be provided for each CPB run using the same  
6 treatment allocation for every CPB run.  
7  
8  
9  
10  
11

12  
13 **Relevant concomitant perioperative care.** Arterial partial pressures of CO<sub>2</sub> will be  
14 maintained constantly in both study arms as per institutional practice (following each centre's  
15 protocols on alpha/pH stat and temperatures). The FiO<sub>2</sub> of the fresh gas flow will be set  
16 between 21% and 100%, according to centre specific CPB protocols. Techniques of anaesthesia  
17 and surgery will not be specified to allow site specific individual practice. The decision whether  
18 a patient requires treatment with inhaled NO (iNO) into the ventilator circuit prior to, during,  
19 or after CPB remains at the discretion of the treating physicians (anaesthetists, cardiac  
20 surgeons, or intensivists) independent of treatment allocation. The postoperative care and  
21 decisions on inotropes and other vasoactive drug delivery, fluid management, renal  
22 replacement therapy, iNO therapy or indication for ECLS will be performed as per site specific  
23 standard protocols of care.  
24  
25  
26  
27  
28  
29  
30  
31  
32  
33  
34  
35  
36  
37  
38  
39  
40

41 **Study outcomes.** The **Primary outcome** is ventilator free days (VFD) for the first 28 days  
42 post randomisation (**Table 2**). The primary outcome will be measured using duration of  
43 invasive respiratory support for all episodes with an endotracheal tube in situ for the first 28  
44 days post randomisation. A systematic zero value will be assigned for patients who die to weigh  
45 death as the most pejorative outcome. Treatment with non-invasive ventilation and high-flow  
46 nasal cannulae will not be considered as ventilator days. **Secondary outcomes** are defined as  
47 the composite outcome compromising LCOS, need for postoperative ECLS, or 28-day  
48 mortality; ICU and hospital length of stay; and health care costs. In addition, the long-term  
49 outcome of patients will be followed up at twelve months post procedure.  
50  
51  
52  
53  
54  
55  
56  
57  
58  
59  
60

1  
2  
3 **LCOS**[10] is defined as a blood lactate level greater than 4 mmol/l with an oxygen extraction  
4  
5 of greater than 35% ( $\text{SaO}_2\text{-ScvO}_2$  gradient >35%) within the first 48 hours postoperatively, or  
6  
7 a high inotrope requirement defined as Vasoactive-Inotrope Score  $\geq 15$  (VIS)[28, 29].  
8  
9

10 **Rationale for primary and secondary outcomes:** Ventilator free days represents one of the  
11  
12 strongest predictors of short- and long-term outcomes[10], including length of intensive care  
13  
14 unit (ICU) stay, morbidity (impaired neurodevelopment, hospital-acquired infections) and  
15  
16 mortality. VFD directly reflect intensive care resource use and health care costs[30]. VFD  
17  
18 fulfills SMART criteria (Specific, Measurable, Achievable, Realistic and Timely). LCOS is  
19  
20 directly related to VFD, as infants usually do not tolerate weaning or fail extubation if LCOS  
21  
22 and organ dysfunction have not resolved. The composite of LCOS, ECLS use, and mortality  
23  
24 as a secondary end point, is a strong patient-centred outcome and directly relates to the  
25  
26 intervention in terms of biological plausibility.  
27  
28  
29  
30  
31  
32

33 **Adverse Events:** It is recognised that the postoperative paediatric cardiac surgical patient  
34  
35 population will experience a number of common aberrations in laboratory values, signs and  
36  
37 symptoms due to the severity of the underlying disease and the impact of standard therapies.  
38  
39 Intensive care patients will frequently develop life-threatening organ failure(s) unrelated to  
40  
41 study interventions and despite optimal management. Therefore, consistent with established  
42  
43 practice in academic ICU trials[31], events that are part of the natural history of the primary  
44  
45 disease process or expected complications of critical illness will not be reported as serious  
46  
47 adverse events in this study. All adverse events which are considered to be potentially causally  
48  
49 related to the study intervention or are otherwise of concern in the investigator's judgement  
50  
51 will be reported unless they are pre-specified study outcomes. Specific adverse events related  
52  
53 to NO delivery during CBP include air embolism, severe hypotension during bypass and  
54  
55 increased MetHb (MetHb >3%). Of note, in previous studies, methaemoglobin values using  
56  
57  
58  
59  
60

1  
2  
3 NO at 20 ppm were similar in both the control and intervention groups (1.4%)[25, 26]. Events  
4 that are collected as study outcomes will not be reported as adverse events.  
5  
6

7  
8 **Safety Data Monitoring.** The Data Safety Monitoring Board (DSMB) consists of a general  
9 and a cardiac paediatric intensivist, a cardiac surgeon, and a statistician. None of the DSMB  
10 members will be involved in recruitment of study patients at their site. DSMB members will  
11 not be supervised by any study investigator or participate as investigators in any study currently  
12 under review by this DSMB. The primary objective of the DSMB is to monitor the safety of  
13 the intervention and the validity and integrity of the data from the NITRIC study. Additionally,  
14 the DSMB will evaluate the pace of recruitment and will make recommendations to the  
15 NITRIC Chief investigator(s) and Steering Board regarding the continuation, modification, or  
16 termination of the study. The DSMB will evaluate on an ongoing basis, the accumulating safety  
17 assessments to ensure the ongoing safety of study subjects. The DSMB will meet via  
18 teleconference call after recruitment of 660, and of 1000 children, respectively, and upon trial  
19 completion.  
20  
21  
22  
23  
24  
25  
26  
27  
28  
29  
30  
31  
32  
33  
34  
35

36 The DSMB can request unblinding in the event of a serious adverse event defined as a cardiac  
37 arrest, need for ECLS, or other incident leading to permanent harm considered to be likely  
38 related to the study intervention.  
39  
40  
41  
42  
43  
44  
45

46 **Sample size.** A pilot study of 134 patients aged < 2 years showed a 2.74 days (66 hours)  
47 increase in ventilator-free days (VFD) associated with the study intervention [26]. This  
48 includes patients who died, who were considered as zero VFDs. The VFD increase associated  
49 with the intervention represents an effect size of 0.33 standard deviations (SD) based on a SD  
50 of 8.1 days in the pilot study control group. Based on the primary outcome measure VFD, 1,320  
51 patients (660 per group) will be required to demonstrate a significant increase in VFD assuming  
52 a minimally clinically significant effect size (0.2 SD; 1.66 days or 40 hours), 90% power, two-  
53  
54  
55  
56  
57  
58  
59  
60

1  
2  
3 sided alpha level of significance of 5%, 10% withdrawals, and 15% increase in sample size to  
4  
5 account for a non-normal distribution of VFD. In Australia and New Zealand approximately  
6  
7 800 of children < 2 years of age undergo surgery for a congenital heart defect requiring CPB  
8  
9 each year, including patients with multiple procedures. The consent rate of eligible patients  
10  
11 was 78% in the pilot trial[26]. With an expected conservative estimate 60% enrolment rate of  
12  
13 eligible patients, we expect a 3.5-year recruitment period for the study.  
14  
15  
16  
17  
18

### 19 **Data collection, management, and analysis**

20  
21 **Data collection:** Baseline variables (demographics, primary cardiac diagnosis, comorbidities  
22  
23 including syndromes), pre-operative disease severity, surgical data (length of CPB and cross-  
24  
25 clamp, type of surgery and complexity score, other CPB characteristics, blood product usage),  
26  
27 primary end points, secondary end points, pre-determined physiological variables of interest,  
28  
29 and process of care measures will be prospectively recorded into a study REDCap online  
30  
31 database. Plausibility and range checks are implemented. Paired arterial and venous gases will  
32  
33 be collected postoperatively at 0, 6, 12, 24, and 48 hrs (in PICU until discharge to the ward or  
34  
35 removal of arterial and central venous lines, whichever occurs first) to assess for lactate and  
36  
37 SaO<sub>2</sub>-ScvO<sub>2</sub> gradient. Key physiological and blood parameters and Paediatric Logistic Organ  
38  
39 Dysfunction-2 (PELOD-2) scores[32] will be measured at 0, 6, 12, 24, and 48 hours post  
40  
41 admission or until PICU discharge whichever occurs earlier. Delayed chest closure, use of  
42  
43 inhaled NO, and duration of circulatory, renal, and ventilatory support postoperatively will be  
44  
45 recorded. Gross functional performance assessment will be recorded on admission to PICU  
46  
47 and upon discharge from hospital[33]. Neurological and functional outcome (including phone  
48  
49 interviews with parents/caregivers) will be assessed at 12 months postoperatively using Ages  
50  
51 and Stages questionnaires (ASQ)[34, 35] and assessment of quality of life using paediatric  
52  
53  
54  
55  
56  
57  
58  
59  
60

1  
2  
3 quality of life inventory (PedsQL)[36]. Details on the long-term follow-up will be published  
4  
5 separately.  
6  
7  
8  
9

10 **Biobanking:** Blood markers for myocardial injury and inflammatory response will be collected  
11  
12 on induction of anaesthesia (baseline – pre-bypass), at admission to PICU (0 hours – post  
13  
14 bypass) and at 12, and 24 hours, in patients where parents consent to biobanking. Blood will  
15  
16 be collected pre-surgery as preoperative baseline (before onset of cardiac surgery, done by  
17  
18 anaesthetist during the induction of the patient once the arterial line has been inserted): 1-2ml  
19  
20 of EDTA blood (for DNA), 2.5ml of PAXgene blood (for gene expression markers), 1-2ml of  
21  
22 serum; and postoperatively at 0,12,24 hours (in PICU until discharge to the ward): 2.5ml of  
23  
24 PAXgene blood (time point 0), and 1-2ml of serum. The samples will be processed, stored and  
25  
26 shipped according to accepted international standards and batch analysed.  
27  
28  
29  
30

31  
32 The investigators are responsible for ensuring the accuracy, completeness, legibility, and  
33  
34 timeliness of the data reported. The investigators will maintain adequate case histories of study  
35  
36 participants, including accurate case report forms (CRFs), and source documentation. Data will  
37  
38 be prospectively entered into a secure web-based database (REDCap  
39  
40 <https://redcap.health.uq.edu.au/>), hosted by the University of Queensland. Printed paper CRFs  
41  
42 will be available if required. All study information and documentation will be securely stored  
43  
44 for a period of 15 years after the date of the child's eighteenth birthday.  
45  
46  
47  
48  
49

## 50 **Statistical Analysis Plan**

51  
52 **Analysis plan.** Analyses will apply the intention to treat principle. Descriptive statistics will  
53  
54 be used to describe baseline characteristics of the study cohort and each subgroup by treatment  
55  
56 group. The primary outcome measure will be analysed using a Mann-Whitney U test as  
57  
58 ventilator-free days is non-normally distributed variable. Analysis of secondary outcomes  
59  
60



1  
2  
3 includes both comparisons of measurements and proportions, using confidence intervals of  
4 differences as the major method of presentation where possible, otherwise standard techniques  
5 such as Mann-Whitney U tests, t-tests and chi-squared tests will be utilised. Survival outcomes  
6 will be compared between treatment groups using Kaplan-Meier product limit method and log-  
7 rank test. Statistical significance will be set at the 0.05 level for the primary outcome.  
8  
9  
10  
11  
12  
13  
14  
15  
16

17 A safety and efficacy interim analysis after 660 (the half-way point), and after 1000 enrolled  
18 patients will be performed by an independent statistician to evaluate for safety endpoints, to  
19 assess the predictive probability of reaching the study goals, and compare VFD between  
20 treatment groups. Consideration to stopping the trial early by an independent Data and Safety  
21 Monitoring Board (DSMB) will be based on safety concerns, futility, or strong evidence of a  
22 difference between groups for VFD (based on a Haybittle–Peto boundary  $P=0.001$ ). A detailed  
23 analysis plan specifying statistical analyses including health economic analyses will be placed  
24 in the public domain prior to recruitment of the last participant[37].  
25  
26  
27  
28  
29  
30  
31  
32  
33  
34  
35  
36  
37

38 **Biomarker measurements.** Nested sub-studies will be performed in selected samples at sites  
39 performing biobanking (i) to test the impact of the intervention on markers of systemic and  
40 myocardial inflammation; (ii) to compare treatment response between patients depending on  
41 pre-intervention severity assessed by markers of inflammation and organ failure; and (iii) to  
42 biochemically define responders to the intervention (to identify patient subgroups pre-  
43 randomisation that are more likely to respond to a specific treatment). The use of samples/data  
44 will be governed by the study steering board and resulting publications must appropriately  
45 acknowledge the study. Combining a large RCT with a nested biobank is recommended to  
46 maximize scientific knowledge[38].  
47  
48  
49  
50  
51  
52  
53  
54  
55  
56  
57  
58  
59  
60



1  
2  
3 **Health Economic Evaluation.** A within trial economic evaluation will be used to determine  
4 if providing NO is cost-saving compared to usual care from the health system perspective. A  
5 comprehensive cost-effectiveness analysis will be undertaken to determine the level of cost  
6 savings (if any). Length of stay (in PICU and in non-intensive stay) will be the main outcome  
7 variable. Resources used before first discharge will be compared between treatments.  
8 Resources will subsequently be costed, based on hospital cost centre or standard national  
9 sources (e.g. Independent Hospital Pricing Authority).

10  
11  
12  
13  
14  
15  
16  
17  
18  
19  
20 **Monitoring.** The study leadership team is responsible for 100% monitoring of investigator and  
21 study nurse credentials, training records, and delegation of responsibility logs, and will review  
22 100% of Consent Forms. CRFs will be compared to source documentation to ensure data are  
23 accurate and complete. 100% of source data verification of eligibility criteria and the primary  
24 outcome and the composite secondary outcome of LCOS, ECLS or death will be performed.  
25 An independent monitoring per each site will monitor the data fields required for eligibility,  
26 primary, and secondary study endpoints, and SAEs using primary source verification. In  
27 addition, site visits and regular monitoring of the blood sample storage will be performed.  
28  
29  
30  
31  
32  
33  
34  
35  
36  
37  
38  
39

40 **Patient and Public Involvement.** Consumers and the public were consulted to design a video  
41 informing parents about the study. Patients and the public had no other involvement in study  
42 design.  
43  
44  
45  
46  
47  
48  
49

50 **Ethics.** This protocol and the informed consent document and any subsequent modifications  
51 have been reviewed and approved by the human research ethics committee (Children's Health  
52 Queensland HREC/17/QRCH/43). This study will be conducted in compliance with the current  
53 version of the protocol. Any change to the protocol document or Informed Consent Form that  
54 affects the scientific intent, study design, patient safety, or may affect a participants'  
55  
56  
57  
58  
59  
60

1  
2  
3 willingness to continue in the study is considered an amendment, and therefore will be written  
4 and filed as an amendment to this protocol and/or informed consent form. All protocol  
5 deviations must be recorded in the patient record (source document) and on the CRF and must  
6 be reported to the PI. Protocol deviations will be assessed for significance by the Principal  
7 Investigator.  
8  
9

10  
11  
12  
13  
14  
15 Consent will be sought from the parents of every child <2 years of age undergoing CPB for  
16 elective cardiac surgery over the study period. When the family is seen by the surgeons in pre-  
17 assessment clinic (usually days prior to surgery), the study will be mentioned to them by the  
18 surgeon. In addition, the study team will provide study information prior to hospitalisation to  
19 families, including printed study flyers, and links to online study documentation (media  
20 release). Participant confidentiality is strictly held in trust by the participating investigators,  
21 research staff, and the sponsoring institution and their agents. The study protocol,  
22 documentation, data and all other information generated will be held in strict confidence.  
23  
24  
25  
26  
27  
28  
29  
30  
31  
32  
33  
34

35  
36 **Significance:** Postoperative paediatric cardiac surgical patients have a high consumption of  
37 intensive care resources and remain at very high risk of major complications, including cardiac  
38 arrest, death, and long-term neurological impairment. Approximately 10% of children with  
39 CHD survive with major neurological sequelae postoperatively, resulting in a massive lifelong  
40 burden for patients, families, healthcare systems, and the society[13]. An attempt to reduce  
41 LCOS and hence perioperative morbidity has the potential to translate not only to a reduction  
42 in intensive care resource utilisation, but also to impact positively on long-term outcomes.  
43 Side-effects from heart surgery for CHD translate into long-term morbidity, persisting into  
44 adult life with a major impact on other family members and society. This study will deliver the  
45 high-level randomised evidence with the potential to show a reduction in postoperative  
46 morbidity and mortality in children with CHD.  
47  
48  
49  
50  
51  
52  
53  
54  
55  
56  
57  
58  
59  
60

1  
2  
3 **Acknowledgements:** The authors would like to thank the parents and children participating in  
4 this trial and the the medical and nursing and research teams in the participating sites for their  
5 help in study setup, recruitment, data collection, and monitoring of study data.  
6  
7  
8  
9

10  
11  
12 **NITRIC Study Group:**  
13

14  
15  
16  
17 Warwick Butt, Steve Horton, Johnny Millar, Carmel Delzoppo, Yves D`Udekem: Cardiac and  
18 Paediatric Intensive Care Services of Royal Children`s Hospital, Melbourne, Australia  
19

20  
21  
22 John Beca, David Buckley, Taryn Evans, Claire Sherring, John Artrip: Starship Children`s  
23 Hospital Auckland, New Zealand  
24

25  
26  
27 Marino Festa, Killian O`Shaughnessy, David Winlaw, Rebecca Fletcher, Simon Byrne, The  
28 Children`s Hospital at Westmead, Sydney, Australia  
29

30  
31  
32 Simon Erickson, Sam Barr, Rae Kelly, David Andrews: Perth Children`s Hospital, Perth,  
33 Australia  
34

35  
36  
37 Luregn J Schlapbach, Andreas Schibler, Deborah Long, Kerry Johnston, Carla Zuzak, Nelson  
38 Alphonso, Benjamin Anderson: Queensland Children`s Hospital, Brisbane, Australia  
39

40  
41  
42 Antje Blumenthal: The University of Queensland Diamantina Institute, Translational Research  
43 Institute, The University of Queensland, Brisbane, Australia  
44

45  
46  
47 Jonas Fooker, Brenda Gannon: Centre for the Business and Economics of Health, The  
48 University of Queensland, Brisbane, Australia  
49

50  
51  
52 Paul Young: Medical Research Institute of New Zealand, Wellington, New Zealand  
53

54  
55  
56 Mark Jones: School of Public Health, The University of Queensland, Brisbane, Australia  
57  
58  
59  
60

1  
2  
3 Kim van Loon, Nicole JCW van Belle-van Haaren, Bram van Wijk, Erik Koomen, Wilhelmina  
4  
5 Children's Hospital Utrecht, Utrecht, The Netherlands  
6

### 7 8 **Roles and Responsibilities:** 9

10 The study protocol first draft was designed by LJS and AS based on the previous pilot study  
11 design established by SH, and WB. The present study protocol has been revised with input  
12 from SH, DL, KJ, CJ, CD, WB, SE, MF, BG, JF, PY, AB, MJ and JB.  
13  
14

15  
16 The study steering group consists of LJS, SH, DL, WB and AS.  
17

18 LJS, AS, DL, KJ, NA, SE, WB, SH, CdZ, KL, YdU, MF, JB are responsible for local study  
19 setup conduct, and recruitment.  
20  
21

22 AB and LJS are responsible for host inflammation analyses.  
23

24 MJ is responsible for statistical analyses.  
25

26 JF and BG are responsible for health economic analyses.  
27  
28  
29  
30  
31  
32  
33  
34

### 35 **REFERENCES** 36 37 38 39

- 40 1. Triedman JK, Newburger JW: **Trends in Congenital Heart Disease: The Next**  
41 **Decade.** *Circulation* 2016, **133**(25):2716-2733.  
42  
43
- 44 2. Erikssen G, Liestol K, Seem E, Birkeland S, Saatvedt KJ, Hoel TN, Dohlen G, Skulstad  
45 H, Svennevig JL, Thaulow E *et al*: **Achievements in congenital heart defect surgery:**  
46 **a prospective, 40-year study of 7038 patients.** *Circulation* 2015, **131**(4):337-346;  
47 discussion 346.  
48  
49
- 50 3. Marelli AJ, Ionescu-Ittu R, Mackie AS, Guo L, Dendukuri N, Kaouache M: **Lifetime**  
51 **prevalence of congenital heart disease in the general population from 2000 to 2010.**  
52 *Circulation* 2014, **130**(9):749-756.  
53  
54  
55  
56  
57  
58  
59  
60

- 1  
2  
3 4. Marelli AJ, Mackie AS, Ionescu-Ittu R, Rahme E, Pilote L: **Congenital heart disease**  
4 **in the general population: changing prevalence and age distribution.** *Circulation*  
5  
6 2007, **115**(2):163-172.  
7  
8
- 9  
10 5. Kaltman JR, Andropoulos DB, Checchia PA, Gaynor JW, Hoffman TM, Laussen PC,  
11  
12 Ohye RG, Pearson GD, Pigula F, Tweddell J *et al*: **Report of the pediatric heart**  
13 **network and national heart, lung, and blood institute working group on the**  
14 **perioperative management of congenital heart disease.** *Circulation* 2010,  
15 **121**(25):2766-2772.  
16  
17
- 18 6. Zahler S, Massoudy P, Hartl H, Hahnel C, Meisner H, Becker BF: **Acute cardiac**  
19 **inflammatory responses to postischemic reperfusion during cardiopulmonary**  
20 **bypass.** *Cardiovasc Res* 1999, **41**(3):722-730.  
21  
22
- 23 7. Levy JH, Tanaka KA: **Inflammatory response to cardiopulmonary bypass.** *Ann*  
24 *Thorac Surg* 2003, **75**(2):S715-720.  
25  
26
- 27 8. Duval EL, Kavelaars A, Veenhuizen L, van Vught AJ, van de Wal HJ, Heijnen CJ:  
28 **Pro- and anti-inflammatory cytokine patterns during and after cardiac surgery in**  
29 **young children.** *Eur J Pediatr* 1999, **158**(5):387-393.  
30  
31
- 32 9. Domanski MJ, Mahaffey K, Hasselblad V, Brener SJ, Smith PK, Hillis G, Engoren M,  
33 Alexander JH, Levy JH, Chaitman BR *et al*: **Association of myocardial enzyme**  
34 **elevation and survival following coronary artery bypass graft surgery.** *JAMA* 2011,  
35 **305**(6):585-591.  
36  
37
- 38 10. Hoffman TM, Wernovsky G, Atz AM, Kulik TJ, Nelson DP, Chang AC, Bailey JM,  
39 Akbary A, Kocsis JF, Kaczmarek R *et al*: **Efficacy and safety of milrinone in**  
40 **preventing low cardiac output syndrome in infants and children after corrective**  
41 **surgery for congenital heart disease.** *Circulation* 2003, **107**(7):996-1002.  
42  
43  
44  
45  
46  
47  
48  
49  
50  
51  
52  
53  
54  
55  
56  
57  
58  
59  
60

- 1  
2  
3 11. Duke T, Stocker C, Butt W: **Monitoring children after cardiac surgery: a minimalist**  
4 **approach might be maximally effective.** *Crit Care Resusc* 2004, **6(4):306-310.**  
5  
6
- 7  
8 12. McElhinney DB, Wernovsky G: **Outcomes of neonates with congenital heart**  
9 **disease.** *Curr Opin Pediatr* 2001, **13(2):104-110.**  
10  
11
- 12  
13 13. Ballweg JA, Wernovsky G, Gaynor JW: **Neurodevelopmental outcomes following**  
14 **congenital heart surgery.** *Pediatr Cardiol* 2007, **28(2):126-133.**  
15  
16
- 17  
18 14. Marino BS: **New concepts in predicting, evaluating, and managing**  
19 **neurodevelopmental outcomes in children with congenital heart disease.** *Curr Opin*  
20 *Pediatr* 2013, **25(5):574-584.**  
21  
22
- 23  
24 15. Marino BS, Lipkin PH, Newburger JW, Peacock G, Gerdes M, Gaynor JW, Mussatto  
25 KA, Uzark K, Goldberg CS, Johnson WH, Jr. *et al*: **Neurodevelopmental outcomes**  
26 **in children with congenital heart disease: evaluation and management: a scientific**  
27 **statement from the American Heart Association.** *Circulation* 2012, **126(9):1143-**  
28 **1172.**  
29  
30  
31  
32
- 33  
34 16. Brown MD, Wernovsky G, Mussatto KA, Berger S: **Long-term and developmental**  
35 **outcomes of children with complex congenital heart disease.** *Clin Perinatol* 2005,  
36 **32(4):1043-1057, xi.**  
37  
38  
39
- 40  
41 17. Bronicki RA, Backer CL, Baden HP, Mavroudis C, Crawford SE, Green TP:  
42 **Dexamethasone reduces the inflammatory response to cardiopulmonary bypass in**  
43 **children.** *Ann Thorac Surg* 2000, **69(5):1490-1495.**  
44  
45  
46  
47  
48
- 49  
50 18. Elhoff JJ, Chowdhury SM, Zyblewski SC, Atz AM, Bradley SM, Graham EM:  
51 **Intraoperative Steroid Use and Outcomes Following the Norwood Procedure: An**  
52 **Analysis of the Pediatric Heart Network's Public Database.** *Pediatric critical care*  
53 *medicine : a journal of the Society of Critical Care Medicine and the World Federation*  
54 *of Pediatric Intensive and Critical Care Societies* 2016, **17(1):30-35.**  
55  
56  
57  
58  
59  
60

- 1  
2  
3  
4  
5  
6  
7  
8  
9  
10  
11  
12  
13  
14  
15  
16  
17  
18  
19  
20  
21  
22  
23  
24  
25  
26  
27  
28  
29  
30  
31  
32  
33  
34  
35  
36  
37  
38  
39  
40  
41  
42  
43  
44  
45  
46  
47  
48  
49  
50  
51  
52  
53  
54  
55  
56  
57  
58  
59  
60
19. Hataishi R, Rodrigues AC, Neilan TG, Morgan JG, Buys E, Shiva S, Tambouret R, Jassal DS, Raheer MJ, Furutani E *et al*: **Inhaled nitric oxide decreases infarction size and improves left ventricular function in a murine model of myocardial ischemia-reperfusion injury.** *American journal of physiology Heart and circulatory physiology* 2006, **291**(1):H379-384.
  20. Chello M, Mastroroberto P, Perticone F, Celi V, Colonna A: **Nitric oxide modulation of neutrophil-endothelium interaction: difference between arterial and venous coronary bypass grafts.** *J Am Coll Cardiol* 1998, **31**(4):823-826.
  21. Jones SP, Bolli R: **The ubiquitous role of nitric oxide in cardioprotection.** *J Mol Cell Cardiol* 2006, **40**(1):16-23.
  22. Jones SP, Girod WG, Palazzo AJ, Granger DN, Grisham MB, Jourd'Heuil D, Huang PL, Lefler DJ: **Myocardial ischemia-reperfusion injury is exacerbated in absence of endothelial cell nitric oxide synthase.** *Am J Physiol* 1999, **276**(5 Pt 2):H1567-1573.
  23. Minamishima S, Kida K, Tokuda K, Wang H, Sips PY, Kosugi S, Mandeville JB, Buys ES, Brouckaert P, Liu PK *et al*: **Inhaled nitric oxide improves outcomes after successful cardiopulmonary resuscitation in mice.** *Circulation* 2011, **124**(15):1645-1653.
  24. Schulz R, Kelm M, Heusch G: **Nitric oxide in myocardial ischemia/reperfusion injury.** *Cardiovasc Res* 2004, **61**(3):402-413.
  25. Checchia PA, Bronicki RA, Muenzer JT, Dixon D, Raithel S, Gandhi SK, Huddleston CB: **Nitric oxide delivery during cardiopulmonary bypass reduces postoperative morbidity in children--a randomized trial.** *J Thorac Cardiovasc Surg* 2013, **146**(3):530-536.

- 1  
2  
3 26. James C, Millar J, Horton S, Brizard C, Molesworth C, Butt W: **Nitric oxide**  
4 **administration during paediatric cardiopulmonary bypass: a randomised**  
5 **controlled trial.** *Intensive Care Med* 2016, **42**(11):1744-1752.  
6  
7  
8  
9  
10 27. Harris PA, Taylor R, Thielke R, Payne J, Gonzalez N, Conde JG: **Research electronic**  
11 **data capture (REDCap)--a metadata-driven methodology and workflow process**  
12 **for providing translational research informatics support.** *Journal of biomedical*  
13 *informatics* 2009, **42**(2):377-381.  
14  
15  
16  
17  
18  
19 28. Gaies MG, Jeffries HE, Niebler RA, Pasquali SK, Donohue JE, Yu S, Gall C, Rice TB,  
20 Thiagarajan RR: **Vasoactive-inotropic score is associated with outcome after infant**  
21 **cardiac surgery: an analysis from the Pediatric Cardiac Critical Care Consortium**  
22 **and Virtual PICU System Registries.** *Pediatr Crit Care Med* 2014, **15**(6):529-537.  
23  
24  
25  
26  
27  
28 29. Gaies MG, Gurney JG, Yen AH, Napoli ML, Gajarski RJ, Ohye RG, Charpie JR,  
29 Hirsch JC: **Vasoactive-inotropic score as a predictor of morbidity and mortality in**  
30 **infants after cardiopulmonary bypass.** *Pediatr Crit Care Med* 2010, **11**(2):234-238.  
31  
32  
33  
34  
35 30. Contentin L, Ehrmann S, Giraudeau B: **Heterogeneity in the definition of mechanical**  
36 **ventilation duration and ventilator-free days.** *Am J Respir Crit Care Med* 2014,  
37 **189**(8):998-1002.  
38  
39  
40  
41  
42 31. Cook D, Lauzier F, Rocha MG, Sayles MJ, Finfer S: **Serious adverse events in**  
43 **academic critical care research.** *CMAJ : Canadian Medical Association journal =*  
44 *journal de l'Association medicale canadienne* 2008, **178**(9):1181-1184.  
45  
46  
47  
48  
49 32. Leteurtre S, Duhamel A, Salleron J, Grandbastien B, Lacroix J, Leclerc F, Groupe  
50 Francophone de Reanimation et d'Urgences P: **PELOD-2: an update of the PEdiatric**  
51 **logistic organ dysfunction score.** *Crit Care Med* 2013, **41**(7):1761-1773.  
52  
53  
54  
55  
56 33. Pollack MM, Holubkov R, Funai T, Clark A, Moler F, Shanley T, Meert K, Newth CJ,  
57 Carcillo J, Berger JT *et al*: **Relationship between the functional status scale and the**  
58  
59  
60



- 1  
2  
3 **pediatric overall performance category and pediatric cerebral performance**  
4 **category scales.** *JAMA Pediatr* 2014, **168**(7):671-676.  
5  
6  
7  
8 34. Pierrat V, Marchand-Martin L, Arnaud C, Kaminski M, Resche-Rigon M, Lebeaux C,  
9 Bodeau-Livinec F, Morgan AS, Goffinet F, Marret S *et al*: **Neurodevelopmental**  
10 **outcome at 2 years for preterm children born at 22 to 34 weeks' gestation in France**  
11 **in 2011: EPIPAGE-2 cohort study.** *Bmj* 2017, **358**:j3448.  
12  
13  
14  
15  
16  
17 35. Noeder MM, Logan BA, Struempfler KL, Condon N, Mueller I, Sands B, Davies RR,  
18 Sood E: **Developmental screening in children with CHD: Ages and Stages**  
19 **Questionnaires.** *Cardiology in the young* 2017, **27**(8):1447-1454.  
20  
21  
22  
23  
24 36. Desai AD, Zhou C, Stanford S, Haaland W, Varni JW, Mangione-Smith RM: **Validity**  
25 **and responsiveness of the pediatric quality of life inventory (PedsQL) 4.0 generic**  
26 **core scales in the pediatric inpatient setting.** *JAMA Pediatr* 2014, **168**(12):1114-  
27 1121.  
28  
29  
30  
31  
32  
33 37. Billot L, Venkatesh B, Myburgh J, Finfer S, Cohen J, Webb S, McArthur C, Joyce C,  
34 Bellomo R, Rhodes A *et al*: **Statistical analysis plan for the Adjunctive**  
35 **Corticosteroid Treatment in Critically Ill Patients with Septic Shock (ADRENAL)**  
36 **trial.** *Critical care and resuscitation : journal of the Australasian Academy of Critical*  
37 *Care Medicine* 2017, **19**(2):183-191.  
38  
39  
40  
41  
42  
43  
44 38. Gustafsson F, Atar D, Pitt B, Zannad F, Pfeffer MA, participants in 10th Cardiovascular  
45 **Clinical Trialists W: Maximizing scientific knowledge from randomized clinical**  
46 **trials.** *Am Heart J* 2010, **159**(6):937-943.  
47  
48  
49  
50  
51  
52  
53  
54  
55  
56  
57  
58  
59  
60

1  
2  
3  
4  
5  
6  
7  
8  
9  
10  
11  
12  
13  
14  
15  
16  
17  
18  
19  
20  
21  
22  
23  
24  
25  
26  
27  
28  
29  
30  
31  
32  
33  
34  
35  
36  
37  
38  
39  
40  
41  
42  
43  
44  
45  
46  
47  
48  
49  
50  
51  
52  
53  
54  
55  
56  
57  
58  
59  
60

**Figures**

**Figure 1.** Study Flow Diagram.

For peer review only

Table 1: Inclusion and Exclusion criteria

| Patient group    | Criterion                     | Definition                                                                                                                                                                                                                                                                                                                                                                                                                                                                                                                                                                                                                                                                                                                                                                                                                                                                              |
|------------------|-------------------------------|-----------------------------------------------------------------------------------------------------------------------------------------------------------------------------------------------------------------------------------------------------------------------------------------------------------------------------------------------------------------------------------------------------------------------------------------------------------------------------------------------------------------------------------------------------------------------------------------------------------------------------------------------------------------------------------------------------------------------------------------------------------------------------------------------------------------------------------------------------------------------------------------|
| <b>Inclusion</b> | <i>Age</i>                    | <ul style="list-style-type: none"> <li>• Postnatal age below 2 years</li> </ul>                                                                                                                                                                                                                                                                                                                                                                                                                                                                                                                                                                                                                                                                                                                                                                                                         |
|                  | <i>Procedure</i>              | <ul style="list-style-type: none"> <li>• Open elective Heart surgery</li> <li>• Cardiopulmonary bypass used during surgery</li> </ul>                                                                                                                                                                                                                                                                                                                                                                                                                                                                                                                                                                                                                                                                                                                                                   |
|                  | <i>Consent</i>                | <ul style="list-style-type: none"> <li>• Parental/caregiver consent available prior to surgery</li> </ul>                                                                                                                                                                                                                                                                                                                                                                                                                                                                                                                                                                                                                                                                                                                                                                               |
| <b>Exclusion</b> | <i>Age</i>                    | <ul style="list-style-type: none"> <li>• Age <math>\geq 2</math> years</li> </ul>                                                                                                                                                                                                                                                                                                                                                                                                                                                                                                                                                                                                                                                                                                                                                                                                       |
|                  | <i>Procedure</i>              | <ul style="list-style-type: none"> <li>• Emergency cardiac surgery which may preclude obtaining informed consent (acutely required life-saving procedure in a patient unlikely to survive the next hours without the surgery)</li> <li>• Heart surgery not requiring cardiopulmonary bypass</li> </ul>                                                                                                                                                                                                                                                                                                                                                                                                                                                                                                                                                                                  |
|                  | <i>Consent</i>                | <ul style="list-style-type: none"> <li>• Lack of parental/caregiver consent</li> </ul>                                                                                                                                                                                                                                                                                                                                                                                                                                                                                                                                                                                                                                                                                                                                                                                                  |
|                  | <i>Pulmonary hypertension</i> | <ul style="list-style-type: none"> <li>• Persistently elevated pulmonary vascular resistance preoperatively receiving inhaled NO or preoperative intravenous use of drugs involved in the NO pathway such as glyceryl trinitrate within 48 hours prior to CPB (oral sildenafil treatment alone is not an exclusion)</li> </ul>                                                                                                                                                                                                                                                                                                                                                                                                                                                                                                                                                          |
|                  | <i>Pre-operative disease</i>  | <ul style="list-style-type: none"> <li>• ECLS immediately prior to surgery</li> <li>• Receiving ongoing treatment with antimicrobials for confirmed or suspected sepsis or septic shock diagnosed within 48 hours prior to the time of surgery</li> <li>• Treated with high doses of vasoactive drugs defined as a Vasoactive-Inotrope Score (VIS) <math>\geq 15</math> within 24 hours prior to surgery<sup>a</sup></li> <li>• Cardiac arrest within one week (7d) prior to surgery</li> <li>• Acute respiratory distress syndrome requiring high frequency oscillatory ventilation within 48 hours prior to surgery</li> <li>• Chronic ventilator dependency (patients treated with non-invasive or invasive ventilation continuously for <math>&gt;28</math> days prior to cardiopulmonary bypass)</li> <li>• Pre-existing methaemoglobinemia (MetHb<math>&gt;3\%</math>)</li> </ul> |

1  
2  
3  
4  
5  
6  
7  
8  
9  
10  
11  
12  
13  
14  
15  
16  
17  
18  
19  
20  
21  
22  
23  
24  
25  
26  
27  
28  
29  
30  
31  
32  
33  
34  
35  
36  
37  
38  
39  
40  
41  
42  
43  
44  
45  
46

a) Gaies MG, Gurney JG, Yen AH, *et al*: Vasoactive-inotropic score as a predictor of morbidity and mortality in infants after cardiopulmonary bypass. *Pediatr Crit Care Med* 2010, **11**(2):234-238.

For peer review only

Table 2: Study outcomes

| Outcome                         | Criterion                                                                                                                                                                                                                                 | Definition                                                                                                                                                                                                                                                                                                                                                                                                                                                                                                                                                                                                                                                                                                                                                                                                                                                                                                                                                                                                                                                                                                                                                                                                                                                              |
|---------------------------------|-------------------------------------------------------------------------------------------------------------------------------------------------------------------------------------------------------------------------------------------|-------------------------------------------------------------------------------------------------------------------------------------------------------------------------------------------------------------------------------------------------------------------------------------------------------------------------------------------------------------------------------------------------------------------------------------------------------------------------------------------------------------------------------------------------------------------------------------------------------------------------------------------------------------------------------------------------------------------------------------------------------------------------------------------------------------------------------------------------------------------------------------------------------------------------------------------------------------------------------------------------------------------------------------------------------------------------------------------------------------------------------------------------------------------------------------------------------------------------------------------------------------------------|
| <b>Primary</b>                  | <i>Ventilator-free days (VFD)</i>                                                                                                                                                                                                         | <ul style="list-style-type: none"> <li>• duration of respiratory support for all episodes for the first 28 days post randomisation</li> <li>• zero value for patients dying within 28 days post randomisation</li> <li>• refers to invasive respiratory support with an endotracheal tube in situ</li> <li>• treatment with non-invasive ventilation and high-flow nasal cannulae will not be considered as ventilator days</li> </ul>                                                                                                                                                                                                                                                                                                                                                                                                                                                                                                                                                                                                                                                                                                                                                                                                                                  |
| <b>Secondary</b>                | <p><i>Composite outcome of low cardiac output syndrome (LCOS), Extracorporeal life support (ECLS), or death</i></p> <p><i>Length of stay</i></p> <p><i>Costs</i></p> <p><i>Neurodevelopmental and functional outcome at 12 months</i></p> | <ul style="list-style-type: none"> <li>• <b>LCOS</b> is defined as one or more of the following<sup>a</sup>: <ul style="list-style-type: none"> <li>- Blood lactate level greater than 4 mmol/l with an oxygen extraction of greater than 35% (SaO<sub>2</sub>-ScvO<sub>2</sub> gradient &gt;35%) within the first 48 hours postoperatively</li> <li>- a high inotrope requirement defined as Vasoactive-Inotrope Score ≥15 (VIS)<sup>b</sup> where VIS = dopamine dose (mcg/kg/min) + dobutamine dose (mcg/kg/min) + 100 x adrenaline dose (mcg/kg/min) + 100 x noradrenaline dose (mcg/kg/min) + 10 x milrinone dose (mcg/kg/min) + 10,000 x vasopressin dose (U/kg/min).</li> </ul> </li> <li>• ECLS is defined as treatment with ECLS during the first 48 hours post randomisation</li> <li>• Death is defined as death occurring within the first 28 days post randomisation</li> <li>• Length of stay in paediatric intensive care unit (PICU)</li> <li>• Length of stay in hospital</li> <li>• Health-care related costs (starting at time of admission to PICU postoperatively)</li> <li>• Ages and Stages Questionnaire (ASQ) scores below threshold for at least one of the five domains measured 12 months post randomisation and Quality of Life</li> </ul> |
| <b>Process of care measures</b> | <i>Severity indicators</i>                                                                                                                                                                                                                | <ul style="list-style-type: none"> <li>• Treatment with ECLS postoperatively</li> <li>• Duration of postoperative time spent with open chest including unplanned chest reopening</li> <li>• Treatment and duration of treatment using inhalational nitric oxide postoperatively</li> <li>• Treatment and duration of treatment of postoperative renal replacement therapy</li> </ul>                                                                                                                                                                                                                                                                                                                                                                                                                                                                                                                                                                                                                                                                                                                                                                                                                                                                                    |

---

|                                         |                          |                                                                                                                                                                                                                                                                                                         |
|-----------------------------------------|--------------------------|---------------------------------------------------------------------------------------------------------------------------------------------------------------------------------------------------------------------------------------------------------------------------------------------------------|
| <b><i>Physiological descriptors</i></b> | <i>Host inflammation</i> | <ul style="list-style-type: none"> <li>• Serum cytokine levels measured during the first 24 hours</li> <li>• Inflammation markers measured during the first 24 hours</li> </ul>                                                                                                                         |
|                                         | <i>Myocardial injury</i> | <ul style="list-style-type: none"> <li>• Levels of postoperative serum troponin levels measured during the first 24 hours</li> </ul>                                                                                                                                                                    |
|                                         | <i>Organ dysfunction</i> | <ul style="list-style-type: none"> <li>• Severity and duration of postoperative organ dysfunction measured by PELOD-2</li> <li>• Postoperative Acute Kidney Injury and serum creatinine levels measured during the first 24 hours</li> <li>• Severity and duration of postoperative delirium</li> </ul> |

- a) Hoffman TM, Wernovsky G, Atz AM, *et al*: Efficacy and safety of milrinone in preventing low cardiac output syndrome in infants and children after corrective surgery for congenital heart disease. *Circulation* 2003, 107(7):996-1002.
- b) Gaies MG, Gurney JG, Yen AH, *et al*: Vasoactive-inotropic score as a predictor of morbidity and mortality in infants after cardiopulmonary bypass. *Pediatr Crit Care Med* 2010, 11(2):234-238.

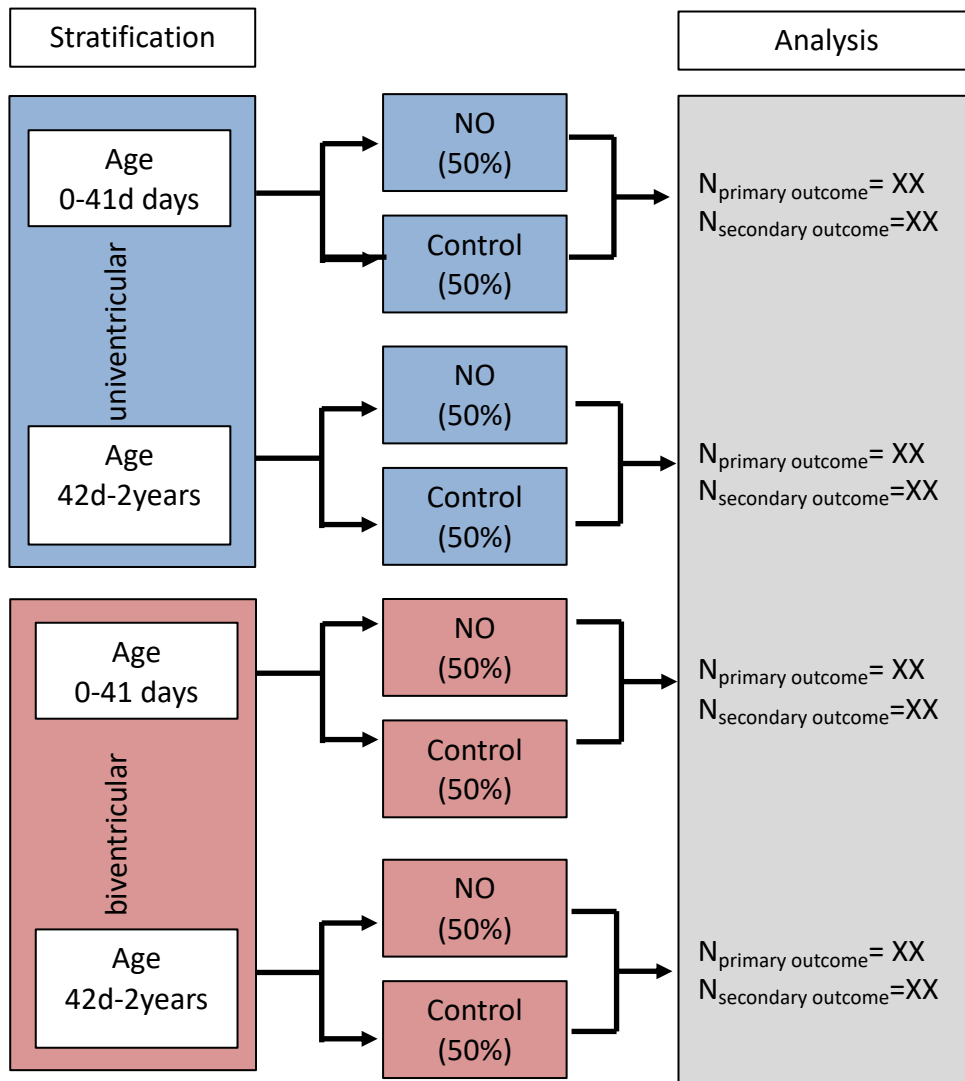

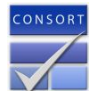

## CONSORT 2010 checklist of information to include when reporting a randomised trial\*

| Section/Topic                    | Item No | Checklist item                                                                                                                                                                              | Reported on page No |
|----------------------------------|---------|---------------------------------------------------------------------------------------------------------------------------------------------------------------------------------------------|---------------------|
| <b>Title and abstract</b>        |         |                                                                                                                                                                                             |                     |
|                                  | 1a      | Identification as a randomised trial in the title                                                                                                                                           | 1                   |
|                                  | 1b      | Structured summary of trial design, methods, results, and conclusions (for specific guidance see CONSORT for abstracts)                                                                     | 7                   |
| <b>Introduction</b>              |         |                                                                                                                                                                                             |                     |
| Background and objectives        | 2a      | Scientific background and explanation of rationale                                                                                                                                          | 9,10                |
|                                  | 2b      | Specific objectives or hypotheses                                                                                                                                                           | 10                  |
| <b>Methods</b>                   |         |                                                                                                                                                                                             |                     |
| Trial design                     | 3a      | Description of trial design (such as parallel, factorial) including allocation ratio                                                                                                        | 11                  |
|                                  | 3b      | Important changes to methods after trial commencement (such as eligibility criteria), with reasons                                                                                          | NA                  |
| Participants                     | 4a      | Eligibility criteria for participants                                                                                                                                                       | 11, Table 1         |
|                                  | 4b      | Settings and locations where the data were collected                                                                                                                                        | 11                  |
| Interventions                    | 5       | The interventions for each group with sufficient details to allow replication, including how and when they were actually administered                                                       | 12,13               |
| Outcomes                         | 6a      | Completely defined pre-specified primary and secondary outcome measures, including how and when they were assessed                                                                          | 13, 14, Table 2     |
|                                  | 6b      | Any changes to trial outcomes after the trial commenced, with reasons                                                                                                                       | NA                  |
| Sample size                      | 7a      | How sample size was determined                                                                                                                                                              | 15                  |
|                                  | 7b      | When applicable, explanation of any interim analyses and stopping guidelines                                                                                                                | 17,18               |
| <b>Randomisation:</b>            |         |                                                                                                                                                                                             |                     |
| Sequence generation              | 8a      | Method used to generate the random allocation sequence                                                                                                                                      | 12                  |
|                                  | 8b      | Type of randomisation; details of any restriction (such as blocking and block size)                                                                                                         | 12                  |
| Allocation concealment mechanism | 9       | Mechanism used to implement the random allocation sequence (such as sequentially numbered containers), describing any steps taken to conceal the sequence until interventions were assigned | 12                  |
| Implementation                   | 10      | Who generated the random allocation sequence, who enrolled participants, and who assigned participants to interventions                                                                     | 12                  |
| Blinding                         | 11a     | If done, who was blinded after assignment to interventions (for example, participants, care providers, those                                                                                | 12                  |



|                                                      |     |                                                                                                                                                   |                   |
|------------------------------------------------------|-----|---------------------------------------------------------------------------------------------------------------------------------------------------|-------------------|
|                                                      |     | assessing outcomes) and how                                                                                                                       |                   |
|                                                      | 11b | If relevant, description of the similarity of interventions                                                                                       | 12,13             |
| Statistical methods                                  | 12a | Statistical methods used to compare groups for primary and secondary outcomes                                                                     | 17,18             |
|                                                      | 12b | Methods for additional analyses, such as subgroup analyses and adjusted analyses                                                                  | 17,18, Table 2    |
| <b>Results</b>                                       |     |                                                                                                                                                   |                   |
| Participant flow (a diagram is strongly recommended) | 13a | For each group, the numbers of participants who were randomly assigned, received intended treatment, and were analysed for the primary outcome    | Figure 1, page 16 |
|                                                      | 13b | For each group, losses and exclusions after randomisation, together with reasons                                                                  | Figure 1          |
| Recruitment                                          | 14a | Dates defining the periods of recruitment and follow-up                                                                                           | 7                 |
|                                                      | 14b | Why the trial ended or was stopped                                                                                                                | NA                |
| Baseline data                                        | 15  | A table showing baseline demographic and clinical characteristics for each group                                                                  | NA                |
| Numbers analysed                                     | 16  | For each group, number of participants (denominator) included in each analysis and whether the analysis was by original assigned groups           | NA                |
| Outcomes and estimation                              | 17a | For each primary and secondary outcome, results for each group, and the estimated effect size and its precision (such as 95% confidence interval) | NA                |
|                                                      | 17b | For binary outcomes, presentation of both absolute and relative effect sizes is recommended                                                       | NA                |
| Ancillary analyses                                   | 18  | Results of any other analyses performed, including subgroup analyses and adjusted analyses, distinguishing pre-specified from exploratory         | NA                |
| Harms                                                | 19  | All important harms or unintended effects in each group (for specific guidance see CONSORT for harms)                                             | 14,15             |
| <b>Discussion</b>                                    |     |                                                                                                                                                   |                   |
| Limitations                                          | 20  | Trial limitations, addressing sources of potential bias, imprecision, and, if relevant, multiplicity of analyses                                  | 8, 20             |
| Generalisability                                     | 21  | Generalisability (external validity, applicability) of the trial findings                                                                         | NA                |
| Interpretation                                       | 22  | Interpretation consistent with results, balancing benefits and harms, and considering other relevant evidence                                     | NA                |
| <b>Other information</b>                             |     |                                                                                                                                                   |                   |
| Registration                                         | 23  | Registration number and name of trial registry                                                                                                    | 7                 |
| Protocol                                             | 24  | Where the full trial protocol can be accessed, if available                                                                                       | This submission   |
| Funding                                              | 25  | Sources of funding and other support (such as supply of drugs), role of funders                                                                   |                   |

1  
2  
3  
4  
5  
6  
7  
8  
9  
10  
11  
12  
13  
14  
15  
16  
17  
18  
19  
20  
21  
22  
23  
24  
25  
26  
27  
28  
29  
30  
31  
32  
33  
34  
35  
36  
37  
38  
39  
40  
41  
42  
43  
44  
45  
46

\*We strongly recommend reading this statement in conjunction with the CONSORT 2010 Explanation and Elaboration for important clarifications on all the items. If relevant, we also recommend reading CONSORT extensions for cluster randomised trials, non-inferiority and equivalence trials, non-pharmacological treatments, herbal interventions, and pragmatic trials. Additional extensions are forthcoming: for those and for up to date references relevant to this checklist, see [www.consort-statement.org](http://www.consort-statement.org).

For peer review only
